1 **Direct tissue sensing reprograms TLR4<sup>+</sup> Tfh-like cells inflammatory profile**  
2 **in the joints of rheumatoid arthritis patients**

3 Daniela Amaral-Silva<sup>1,2,3</sup>, Rita C. Torrão<sup>1,2,3</sup>, Rita Torres<sup>4</sup>, Sandra Falcão<sup>4</sup>, Maria  
4 João Gonçalves<sup>4</sup>, Maria Paula Araújo<sup>4</sup>, Maria José Martins<sup>4</sup>, Carina Lopes<sup>4</sup>,  
5 Agna Neto<sup>4</sup>, José Marona<sup>4</sup>, Tiago Costa<sup>4</sup>, Walter Castelão<sup>4</sup>, Ana Bento Silva<sup>4</sup>,  
6 Inês Silva<sup>4</sup>, Maria Helena Lourenço<sup>4</sup>, Margarida Mateus<sup>4</sup>, Nuno Pina Gonçalves<sup>4</sup>,  
7 Santiago Manica<sup>4</sup>, Manuela Costa<sup>4</sup>, Fernando Pimentel-Santos<sup>2,4,5</sup>, Ana Filipa  
8 Mourão<sup>2,4,5</sup>, Jaime C. Branco<sup>3,4</sup>, Helena Soares<sup>1,2,3\*</sup>

9

10 <sup>1</sup>Human Immunobiology and Pathogenesis Group

11 <sup>2</sup>iNOVA4Health | CEDOC, NOVA Medical School | Faculdade de Ciências  
12 Médicas, NOVA University of Lisbon

13 <sup>3</sup>CHRC | CEDOC, NOVA Medical School | Faculdade de Ciências Médicas,  
14 NOVA University of Lisbon

15 <sup>4</sup>Hospital Egas Moniz, Rua da Junqueira nº 126, 1349-019 Lisboa, Portugal

16 <sup>5</sup>Rheumatological Diseases Laboratory

17

18 \*Corresponding Author: Helena Soares, Laboratory of Human Immunobiology  
19 and Pathogenesis, CEDOC-Chronic Diseases Research Center, Rua Câmara  
20 Pestana, 6 1150-082 Lisbon, Portugal. [helena.soares@nms.unl.pt](mailto:helena.soares@nms.unl.pt)

21

22 **Abstract**

23 CD4<sup>+</sup> T cells mediate rheumatoid arthritis (RA) pathogenesis through both  
24 antibody-dependent and independent mechanisms. It remains unclear how  
25 synovial microenvironment impinges on CD4<sup>+</sup> T cells pathogenic functions. Here,  
26 we identified a TLR4<sup>+</sup> follicular helper T (Tfh) cell-like population present in the  
27 blood and expanded in synovial fluid. Mechanistically, we unveiled that homotypic  
28 T-T cell interactions through non-cognate HLA-DR:TCR contacts regulate TLR4  
29 expression on T cells. TLR4<sup>+</sup> T cells possess a two-pronged pathogenic activity.  
30 Upon TCR and ICOS engagement, TLR4<sup>+</sup> T cells produce IL-21, a cytokine  
31 known to sponsor antibody production. However, direct TLR4<sup>+</sup> engagement on T  
32 cells, by endogenous ligands in the arthritic joint, reprograms them towards an  
33 IL-17 inflammatory profile compatible with tissue damage program. Blocking  
34 TLR4 signaling with a specific inhibitor impaired IL-17 production in response to  
35 synovial fluid recognition. Ex vivo, synovial fluid TLR4<sup>+</sup> T cells produced IL-17,  
36 but not IL-21. TLR4<sup>+</sup> T cells appear to uniquely reconcile an ability to promote  
37 systemic antibody production with a local synovial driven tissue damage program.  
38 TLR4<sup>+</sup> T cells could constitute an attractive cellular target and predictive  
39 biomarker for erosive arthritis.

40

41

42

## 43 **Introduction**

44 In rheumatoid arthritis (RA) combined immune and joint tissue dysregulation  
45 synergize in propagating chronic inflammation and articular destruction. CD4<sup>+</sup> T  
46 cells have been strongly implicated in RA pathogenesis through both antibody-  
47 dependent and independent mechanisms<sup>1,2</sup>. It remains unclear, however, which  
48 CD4<sup>+</sup> T cell population drives RA and how joint microenvironment impinges on  
49 their pathogenic functions. Unveiling CD4<sup>+</sup> T cell pathogenic phenotype and its  
50 crosstalk with the arthritic joint environment would benefit diagnosis, patient  
51 stratification and could contribute to the design of better drugs that could  
52 effectively induce remission.

53 Effector functions sponsored by CD4 T cells in the joints constitute an active field  
54 of research. PD-1<sup>high</sup>CXCR5<sup>high</sup> T follicular helper (Tfh) cells are the major T cell  
55 subset driving antibody production by B cells within secondary lymphoid  
56 organs<sup>3,4</sup>. Even though circulating Tfh cell populations are diverse<sup>5</sup>, they have  
57 been defined as CXCR5<sup>+</sup><sup>6,7</sup> and/or PD-1<sup>+</sup>CXCR5<sup>+</sup><sup>8</sup>. In RA, various circulating  
58 Tfh cell populations have been correlated with B cell expansion and increased  
59 disease activity<sup>9-11</sup>. Recently, PD-1<sup>+</sup>CXCR5<sup>-</sup> T cells, which share several markers  
60 with Tfh cells, were reported to infiltrate the inflamed synovium and to induce  
61 antibody production in vitro<sup>12</sup>. Notwithstanding, CD4<sup>+</sup> T cell mediated antibody-  
62 independent mechanisms are at play in RA pathogenesis. Namely, IL-17  
63 production by CD4<sup>+</sup> T cells has been implicated in bone erosions<sup>13,14</sup> and  
64 cartilage damage<sup>15-17</sup>, with its neutralization reducing disease activity<sup>18</sup> and  
65 curtailing cartilage and bone damage<sup>13</sup>. IL-17 production is regulated locally at  
66 the affected joint<sup>19</sup>, requiring both propitious tissue environment and cell-cell  
67 interactions, making it challenging to characterize IL-17 producing CD4<sup>+</sup> T cells

68 in RA. Thus, there is a pressing need to identify the synovium stimuli and the  
69 specific CD4<sup>+</sup> T cell population responding to them driving IL-17 production.

70 T cell effector programs are profoundly shaped by the local tissue micro-  
71 environments where antigen recognition occurs<sup>20</sup>. RA joints are enriched in  
72 endogenous pro-inflammatory molecules and in pathogen recognition receptors  
73 that recognize them, namely Toll Like Receptors (TLRs). Polymorphisms in TLR4  
74 have been found to be associated with increased RA susceptibility in humans<sup>21</sup>  
75 and mice with TLR4 targeted deletions or loss-of-function mutations are protected  
76 from experimental arthritis<sup>22-24</sup>. In addition, TLR4 and its endogenous ligands are  
77 elevated in the synovial fluid and correlate with disease progression<sup>23-27</sup>. Even  
78 though predominantly expressed on innate immune cells, TLR4 has been found  
79 to be expressed at low levels in activated human and mice CD4 T cells<sup>28,29</sup>.  
80 Curiously, TLR4 expression on T cells has been described to both facilitate and  
81 inhibit chronic inflammatory diseases<sup>30</sup>, with its pathological/protective role  
82 varying according to disease type and tissue affected. In a mouse model, TLR4  
83 facilitates autoimmunity by functioning as a TCR co-receptor enhancing survival  
84 and proliferation, without affecting the type or quantity of cytokines produced<sup>31</sup>. It  
85 remains to be elucidated if TLR4 expression is enriched in CD4<sup>+</sup> T cells of RA  
86 patients and whether the joint microenvironment engages TLRs directly on CD4<sup>+</sup>  
87 T cells imprinting dysregulated inflammation and possibly diversifying their  
88 pathological function.

89 The strongest genetic association in RA is with HLA-DR alleles<sup>32</sup>. HLA-DR is  
90 constitutively expressed by antigen presenting cells (APCs) and interactions  
91 between antigen bearing HLA-DR on APCs and cognate TCR on CD4<sup>+</sup> T cells

92 drive full T cell activation<sup>33</sup>. Even though HLA-DR has been used as a marker of  
93 activated T cells for more than 40 years<sup>34,35</sup>, whether or not HLA-DR expression  
94 plays a functional role on activated T cells has remained elusive.

95 We investigated the role of contextual cues in regulating T cell pathogenic  
96 programs in RA patients. We identified that RA patients possess a TLR4<sup>+</sup> T cell  
97 population that is expanded in synovial fluid. Our data unveil that direct TLR4  
98 stimulation on T cells goes beyond functioning as a coreceptor boosting TCR-  
99 driven response. Instead, TLR4 functions as a context sensor allowing to spatially  
100 tailor the pathological response elicited. Compatible with a systemic antibody  
101 response, TLR4<sup>+</sup> T cells produce IL-21 upon TCR and ICOS engagement. Direct  
102 recognition of synovial components by TLR4 on T cells drives an inflammatory  
103 IL-17 program compatible with joint damage. Mechanistically, we uncovered for  
104 the first time a functional role for HLA-DR on T cells. We found that HLA-DR  
105 mediated homotypic T-T cell interactions regulate TLR4 expression on T cells,  
106 suggesting an important mechanism by which HLA-DR might drive RA disease  
107 susceptibility. Targeting the bidirectional communication between T cells and the  
108 joint tissue microenvironment might be critical to restore joint tissue homeostasis  
109 and induce RA remission.

110

## 111 **Results**

### 112 **A circulating TLR4<sup>+</sup>CD4<sup>+</sup> T cell population is expanded in the synovial** 113 **fluid of RA patients**

114 TLR4 is a robust tissue-damage sensor implicated in RA initiation and  
115 progression<sup>25-27,36,37</sup>. Previous studies focused on TLR4 expression by innate  
116 immune cells and synoviocytes<sup>26,27,37</sup>. Given CD4<sup>+</sup> T cell role in RA and the  
117 abundance of TLR4 ligands in the arthritic joint, we investigated TLR4 expression

118 by CD4<sup>+</sup> T cells in freshly obtained synovial fluid from 9 RA patients (Table S1)  
119 undergoing arthrocentesis. Confirming our hypothesis, TLR4 was indeed  
120 expressed by ~30% of CD4<sup>+</sup> T cells in the synovial fluid (Fig. 1A). When  
121 compared to TLR4<sup>-</sup> T cells, TLR4<sup>+</sup> T cells, displayed bigger relative size and  
122 complexity, measured as FSC-A and SSC-A, respectively (Fig. 1B, C). Next, we  
123 assessed whether synovial fluid TLR4<sup>+</sup> T cells would have a circulating  
124 counterpart by examining freshly obtained peripheral blood of 100 RA patients  
125 (Table S1). To ensure that we would be inclusive of CD4<sup>+</sup> T cell with higher FSC-  
126 A/SSC-A, as the ones found in synovial TLR4<sup>+</sup> T cells, we gated first on  
127 CD3<sup>high</sup>CD4<sup>high</sup> T cells (Fig. 1B). Right away, we could detect two CD4<sup>+</sup> T cell  
128 populations with distinct relative sizes and complexities. We performed doublet  
129 analysis, by plotting FSC-W versus FSC-A, we observed that these CD4<sup>+</sup> T cell  
130 populations distribute along two distinct diagonals, suggesting that they are two  
131 distinct populations rather than cell conjugates. As determined for synovial TLR4<sup>+</sup>  
132 T cells (Fig. 1A), TLR4 expression clustered on FSC-A<sup>high</sup>SSC-A<sup>high</sup>CD4<sup>+</sup> T cells  
133 (Fig. 1D, E, F). The frequency of TLR4<sup>+</sup> T cells in ranged between 0.02% and  
134 28.7%, with a mean of ~5% and mode of ~1.3% (Fig. 1D). Donor matched  
135 analysis revealed a ~4- and ~12-fold enrichment in the frequency and expression  
136 levels, respectively, of TLR4<sup>+</sup> T cells in synovial fluid relatively to the blood (Fig.  
137 1 G, H). We found a correlation between the frequency of TLR4<sup>+</sup> T cells in  
138 circulation and in the synovial fluid (Fig. 1I), suggesting that the blood faithfully  
139 reflects the enrichment of TLR4<sup>+</sup> T cells in the synovial compartment.  
140 We reasoned that the increase in FSC-A and SSC-A values by synovial fluid and  
141 circulating TLR4<sup>+</sup> T cells could reverberate their increased activation state. To  
142 address this possibility, we stained for T cell activation markers HLA-DR and PD-

143 1. t-SNE analysis showed that PD-1 is expressed by various T cell populations,  
144 including TLR4<sup>+</sup> T cells while, HLA-DR is selectively expressed by TLR4<sup>+</sup> T cells  
145 (Fig. 1J). To formally exclude the possibility that bigger size of TLR4<sup>+</sup> T cells was  
146 not due to cell aggregates and that a T cell population in RA patients does indeed  
147 express TLR4, we used HLA-DR as a proxy marker for TLR4<sup>+</sup> T cells and sorted  
148 HLA-DR<sup>+</sup> and HLA-DR<sup>-</sup> CD4<sup>+</sup> T cells by flow cytometry (Fig. S1A). We surface  
149 labelled HLA-DR<sup>-</sup> and HLA-DR<sup>+</sup> T cells for CD3 and TLR4 and analyzed them by  
150 confocal microscopy (Fig. 1K). Only, HLA-DR<sup>+</sup> T cells displayed TLR4 at cell  
151 membrane, where it colocalized with CD3. The fact that TLR4 is evenly  
152 distributed throughout the cellular membrane disproves the possibility that these  
153 T cells gained TLR4 through trogocytosis<sup>38</sup>. As FSC-A only provides a relative  
154 measure of cell size, we calculated the 3D volume and measured larger width of  
155 both TLR4<sup>-</sup> and TLR4<sup>+</sup> T cells and found TLR4<sup>+</sup> T cells to be bigger and wider  
156 than TLR4<sup>-</sup> T cells (Fig. 1 K-M). Moreover, we observed that TLR4<sup>+</sup> T cells  
157 exhibited membrane projections and alterations in their cell shape. To quantify  
158 the latter, we calculated roundness coefficient (ratio between the smallest and  
159 the larger diameter), where a roundness index of 1 characterizes perfectly round  
160 cells, with values <1 depicting a departure from it<sup>33</sup>. TLR4<sup>+</sup> T cells roundness  
161 index was ~0.8. Altogether, the higher FSC-A value of TLR4<sup>+</sup> T cells is likely due  
162 to a combination of bigger cell size and alterations in cell shape caused by  
163 membrane projections.

164 TLR4 expression has been reported on senescent T cells in spondylarthritis  
165 patients<sup>39</sup>. Curiously, these TLR4<sup>+</sup> senescent T cells were more prevalent in the  
166 blood than in the synovial fluid<sup>39</sup>. To exclude the possibility that the cells we  
167 identified are non-replicative senescent cells, we labelled them for the

168 proliferation marker Ki67. We found TLR4<sup>+</sup> T cells to be highly proliferative, with  
169 ~75% of TLR4<sup>+</sup> T cells undergoing cell cycle and ~90% upregulating the  
170 activation marker CD38 (Fig. 1 O-S). Upregulation of HLA-DR, CD38 and Ki-67  
171 by TLR4<sup>+</sup> T cells supports their chronic activation, rather than a senescent, state.  
172 Since TLR4<sup>-</sup> and TLR4<sup>+</sup> have distinct cell sizes, they also display different  
173 autofluorescence. In order to correct for the effect of autofluorescence in our  
174 measurements we calculated  $\Delta$ MFI by subtracting the fluorescence intensity  
175 minus one (FMO) from median fluorescence intensity (MFI) for each flow  
176 cytometer channel. We maintained this approach throughout all experiments.  
177 Collectively, we have identified a previously uncharacterized TLR4<sup>+</sup> T cell  
178 population in RA patients. These TLR4<sup>+</sup> T cells exhibit activation markers HLA-  
179 DR and CD38, a bigger cell size, and are highly proliferative, which is consistent  
180 with a T cell blast phenotype. Even though they can be detected in the blood,  
181 they are expanded in the synovial fluid, suggesting a role for these cells as drivers  
182 in RA pathology.

183

#### 184 **TLR4<sup>+</sup> T cell population correlates with anti-CCP antibody titers**

185 Next, we pursued the relation between TLR4<sup>+</sup> T cells and RA demographics,  
186 disease presentation and severity, and treatment. TLR4<sup>+</sup> T cell frequency was  
187 not affected by age nor by biological gender (Fig. 2 A, B). RA has two clinical  
188 presentations, seropositive RA in which antibodies to either rheumatoid factor  
189 (RF) or to citrullinated (CCP) proteins are present and seronegative RA in which  
190 such antibodies are absent. TLR4<sup>+</sup> T cells were present in both seropositive and  
191 seronegative patients (Fig. 2 C-E). Nonetheless, the frequency of TLR4<sup>+</sup> T cells  
192 correlated with anti-CCP antibody titers in CCP<sup>+</sup> patients (Fig. 2 F). The majority



193 of patients in our cohort were either in clinical remission (66.7%) or presented low  
194 (12.3%) or moderate (18.5%) disease activity, with only 2.5% of the patients  
195 displaying a high disease activity score. Reflecting the high prevalence of patients  
196 with remitted or controlled disease (97.5%), we did not detect any correlation  
197 between disease activity score, measured either as DAS ESR (Fig. 2G) or DAS  
198 CRP (Fig. 2H) and TLR4<sup>+</sup> T cells frequency (Fig. 2 G, H). Likewise, there was no  
199 detectable difference in TLR4<sup>+</sup> T cell frequency when comparing different  
200 treatments by families (Fig. 2 I) nor for the supplementation of anti-inflammatory  
201 (Fig. 2 J) or corticosteroid (Fig. 2 K) drugs. When analyzed by individual drug use  
202 methotrexate (Fig. 2 L) and leflunomide (Fig. 2 M) exhibited a trend for slightly  
203 better and slightly worse outcomes, respectively, when compared to other drugs  
204 in the study (Fig. 2 L-P). Lastly, DMARD treatment duration does not seem to  
205 impact TLR4<sup>+</sup> T cell frequency (Fig. 2 Q).

206 In summary, TLR4<sup>+</sup> T cells persist in patients with controlled RA, regardless of  
207 treatment regimen, and correlate with anti-CCP antibody titers.

208

## 209 **HLA-DR mediated homotypic T-T cell interactions drive TLR4 surface** 210 **expression**

211 The strongest genetic association for developing RA is carried by HLA-DR  
212 alleles<sup>32</sup>. Even though HLA-DR has been used as a marker of T cell activation for  
213 more than 40 years, its functional role has remained elusive. Intrigued by the  
214 strong co-expression between HLA-DR and TLR4 (Fig. 1J, 3A), we analyzed the  
215 frequency of TLR4 expression by HLA-DR<sup>+</sup>CD4<sup>+</sup> T cells (Fig. 3B) and  
216 reciprocally, the frequency of HLA-DR expression by TLR4<sup>+</sup>CD4<sup>+</sup> T cells (Fig.  
217 3C). While ~80% of HLA-DR<sup>+</sup>CD4<sup>+</sup> T cells co-expressed TLR4, ~98% of

218 TLR4<sup>+</sup>CD4<sup>+</sup> T cells co-expressed HLA-DR. When looking at their cellular  
219 abundance, higher expression of HLA-DR was accompanied by greater TLR4  
220 expression (Fig. 3D). Taken together, the above data suggested that there might  
221 be a link between HLA-DR and TLR4 expression.

222 Recognition of noncognate-antigen:HLA-DR complexes on APCs by the TCR,  
223 albeit incapable of driving full T cell activation, generates nuanced effects on T  
224 cell activation and gene expression<sup>40,41</sup>. We posited that homotypic T-T cell  
225 interactions through non-cognate HLA-DR:TCR contacts could control TLR4  
226 expression on T cells. To address this possibility, we FACS-purified circulating  
227 CD4<sup>+</sup> T cells with purity >99% (Fig. S1 B, C) and incubated them overnight with  
228 anti-HLA-DR blocking antibody or medium (Fig. 3E). Blocking HLA-DR  
229 dependent T-T cell contacts, led to a stark decrease in TLR4 surface expression  
230 (Fig. 3E). Indicating that HLA-DR regulates TLR4 expression through homotypic  
231 T-T cell interactions, in which HLA-DR on a T cell engages TCR on a neighboring  
232 one.

233 Altogether, our data identifies, for the first time, a functional role for HLA-DR on  
234 CD4<sup>+</sup> T cells in which homotypic T-T cell interactions through HLA-DR:TCR  
235 contacts regulate TLR4 expression and suggest a novel mechanism by which  
236 HLA-DR might drive RA disease susceptibility.

237

### 238 **TLR4<sup>+</sup> T cells share features of Tfh cells**

239 Tfh-like T cells have been implicated in RA and other chronic inflammatory  
240 diseases due to their capability to induce antibody production<sup>11,12,42</sup>. We checked  
241 whether TLR4<sup>+</sup> T cells would share Tfh features, namely high expression of  
242 chemokine receptor CXCR5 and of the co-receptors PD-1 (Fig. 1J) and ICOS.

243 Even though CXCR5 (Fig. 4 A-C) and PD-1 (Fig. 4 A, D, E) could be detected in  
244 both TLR4<sup>-</sup> and TLR4<sup>+</sup> T cell populations, they were enriched in TLR4<sup>+</sup> T cells  
245 with a co-expression of ~80% (Fig. 4F). Curiously, ICOS was more expressed in  
246 TLR4<sup>-</sup> than in TLR4<sup>+</sup> T cells (Fig. 4 A, G, H). Nonetheless, in TLR4<sup>+</sup> T cells co-  
247 expression of ICOS and CXCR5 (Fig. 4H) and ICOS and PD-1 (Fig. 4J) was  
248 enriched. The fact that TLR4<sup>+</sup> T cells are enriched of CXCR5 and PD-1 suggests  
249 that they might consist a circulating Tfh-like population<sup>6,7</sup>. To characterize this  
250 further, we explored whether the enrichment in TLR4<sup>+</sup> T cells could reflect the  
251 frequency of circulating Tfh cells. TLR4<sup>+</sup> T cell frequency positively correlated  
252 with the frequency of CXCR5<sup>+</sup> (Fig. 2K) and PD-1<sup>+</sup> (Fig. 2L) circulating CD4<sup>+</sup> T  
253 cells.

254 These data indicate that TLR4<sup>+</sup> T cells display Tfh-like features.

255

### 256 **TLR4<sup>+</sup> T cells display migratory phenotype to inflamed tissues**

257 TLR4<sup>+</sup> T cell enrichment in synovial fluid (Fig. 1 G, H) cannot be fully explained  
258 by their CXCR5 expression. Therefore, we checked for the expression of  
259 chemokine receptors CCR2 and CCR6 that regulate T cell migration to inflamed  
260 tissues and whose ligands are abundantly present in arthritic synovium and have  
261 been implicated in the disease<sup>43,44</sup>. Both CCR2 and CCR6 were upregulated by  
262 TLR4<sup>+</sup> T cells (Fig 5 B-E). CCR2 and CCR6 are expressed by ~100% and ~30%  
263 of TLR4<sup>+</sup> T cells, respectively (Fig. 5 B-E). While CCR2 guides a broad range of  
264 immune cells into sites of inflammation, CCR6 is associated with the recruitment  
265 of IL-17 producing T cells to inflamed joints<sup>45</sup>, suggesting an IL-17 inflammatory  
266 component to TLR4<sup>+</sup> T cell synovial recruitment. To address this possibility, we  
267 checked whether TLR4<sup>+</sup> T cells upregulate receptors for pro-inflammatory

268 cytokines that are overexpressed in inflamed synovium (IL-1, IL-6 and IL-17) and  
269 which have been implicated in IL-17 production<sup>45,46</sup>. IL-1R, whose engagement  
270 plays a critical in driving IL-17 mediated autoimmunity<sup>46</sup>, was selectively  
271 upregulated by TLR4<sup>+</sup> T cells (Fig. 5 A, H, I). As expected from IL-6 pleiotropic  
272 role in immune responses, IL-6R was similarly expressed by both TLR4<sup>+</sup> and  
273 TLR4<sup>-</sup> T cell populations (Fig. 5 F, J, K). Finally, IL-17R, whose signaling  
274 reinforces IL-17 production and CD4<sup>+</sup> T cells autoimmune profile<sup>47</sup>, was greatly  
275 enriched in TLR4<sup>+</sup> T cells (Fig. 5 G, L, M). In addition, since TLR4<sup>+</sup> T cells  
276 displayed a bigger cell size, we checked for the receptor of IL-2 alpha (IL-2R $\alpha$ ),  
277 whose ligation drives T cell growth. IL-2R was increasingly expressed by TLR4<sup>+</sup>  
278 (Fig. 5 N, O).

279 Taken together TLR4<sup>+</sup> T cells emerge as a Tfh-like cell population with a  
280 preferential tropism for inflamed tissues and increased capability to respond to  
281 IL-17 promoting stimuli. Curiously, TLR4<sup>+</sup> T cells are not predisposed to respond  
282 to IL-6, which is involved in driving both Tfh cell differentiation<sup>48</sup> and IL-17  
283 production<sup>45</sup>, that is a current RA treatment target. Instead, TLR4<sup>+</sup> T cells are  
284 predisposed to preferentially respond to IL-1 and IL-17. Due to the involvement  
285 of both IL-1R and IL-17R signaling in promoting chronic inflammatory IL-17  
286 responses<sup>46,47</sup>, selective increased expression of these receptors might ascribe  
287 a dysregulated IL-17 producing profile to TLR4<sup>+</sup> T cells.

288

### 289 **TLR4 engagement reprograms TLR4<sup>+</sup> T cell inflammatory profile**

290 While in humans, the role of direct TLR4 engagement on CD4<sup>+</sup> T cells remains  
291 largely unaddressed, in experimental autoimmune encephalitis, TLR4  
292 engagement on CD4<sup>+</sup> T cells has been reported to function as a co-receptor

293 boosting T cell survival and proliferation without affecting the amount of the  
294 cytokines produced<sup>31</sup>. Whether or not direct TLR4 engagement on CD4<sup>+</sup> T cells  
295 modulates or alters CD4<sup>+</sup> T cell inflammatory profile has remained unanswered.  
296 To unveil the contribution of direct TLR4 engagement on T cell inflammatory  
297 profile, we FACS purified circulating CD4<sup>+</sup> T cells from freshly obtained blood (Fig  
298 S1B; purity >99%) and stimulated them with highly purified TLR4 ligand LPS in  
299 the presence or absence of TCR and ICOS engagement. Since we had  
300 determined that TLR4<sup>+</sup> T cells share features of Tfh-like cells and possess an IL-  
301 17 flavored pro-inflammatory phenotype, we looked at the antibody inducing  
302 cytokines which have been in RA pathology due to their role in promoting  
303 antibody production (IL-21<sup>12</sup> and IL-10<sup>60</sup>), or in inducing joint tissue damage (IL-  
304 10<sup>61</sup>, IL-17<sup>15,19,49,50</sup> and TNF- $\alpha$ <sup>59</sup>). Circulating TLR4<sup>+</sup> T cells produced IL-10, IL-  
305 21 and IL-17 in unstimulated conditions, supporting their ongoing activation state.  
306 In vitro, IL-21 production required TCR and ICOS stimulation and was completely  
307 non-responsive to LPS (Fig. 6 A, B). In contrast, LPS, in combination with TCR  
308 and ICOS stimulation, boosted IL-10, IL-17 and TNF- $\alpha$  production (Fig. 6 C-H).  
309 Moreover, LPS alone was sufficient to drive production of IL-10 and trended to  
310 increase IL-17 and TNF- $\alpha$  production, as well (Fig. 6 C, G).  
311 In sum, these data indicate that direct TLR4 stimulation goes beyond functioning  
312 as a coreceptor boosting TCR-driven response. While TCR and ICOS stimulation  
313 favors IL-21 production, LPS engagement shifts the inflammatory profile toward  
314 IL-17, TNF- $\alpha$  and of IL-10 production. Suggesting that TLR4 engagement by LPS  
315 might reprogram TLR4<sup>+</sup> T cells from an IL-21 driven pro-antibody program to an  
316 inflammatory program fueling joint damage  
317

318 **Direct recognition of TLR4 ligands present in synovial fluid drives IL-17**  
319 **production, independently of antigen recognition.**

320 Increased expression of endogenous TLR4 ligands has been observed in the  
321 blood and synovial fluid of RA patients, with a role in arthritis being suggested in  
322 mice models<sup>51-54</sup>. Of all the proposed endogenous TLR4 ligands, tenascin-C is  
323 the one more thoroughly analyzed, including the molecular identification of its  
324 binding sites on TLR4<sup>55</sup>. Under physiological conditions, tenascin-C is tightly  
325 controlled, being virtually undetectable in healthy tissues, with transient re-  
326 expression occurring during tissue remodeling. Nonetheless, sustained tenascin-  
327 C accumulation occurs in a variety of chronic pathological conditions, including  
328 blood and synovial fluid of RA patients<sup>26</sup>. We quantified tenascin-C in synovial  
329 fluid of RA patients (Fig. 7 A-C). Synovial tenascin-C levels are independent of  
330 duration of DMARD treatment (Fig. 7 A), suggesting that tissue synovial  
331 deterioration persists despite of treatment. Moreover, TLR4<sup>+</sup> T cells appear to be  
332 enriched in synovial fluids with higher tenascin-C levels (Fig. 7C), opening the  
333 possibility that tenascin-C might play a role in the enrichment of TLR4<sup>+</sup> T cells in  
334 the synovial fluid. As we had observed that circulating TLR4<sup>+</sup> T cells were  
335 producing IL-17 and IL-10 prior to in vitro restimulation (Fig. 6), we wondered  
336 whether this basal cytokine production was due to the ongoing engagement of  
337 TLR4. To address this possibility, we treated circulating TLR4<sup>+</sup> T cells with either  
338 medium or with the TLR4 signaling inhibitor CLI-095. Blocking TLR4 signaling  
339 hampered both IL-17 and IL-10 production (Fig. 7 D-G). To further explore the  
340 role of direct TLR4 engagement by synovial components, we stimulated sorted  
341 CD3<sup>high</sup>CD4<sup>high</sup> T cells with cell-depleted synovial fluid in the presence or absence  
342 of TLR4 signaling inhibitor. Stimulation with synovial fluid induced IL-17, IL-10

343 and TNF- $\alpha$ , but not IL-21, production. Increased IL-17, IL-10 and TNF- $\alpha$   
344 production was mediated by direct TLR4 engagement, as it was abrogated by the  
345 addition of TLR4 specific signaling inhibitor CLI-095 (Fig. 7 H-J). In contrast to  
346 LPS (Fig. 6), direct TLR4 engagement by endogenous synovial ligands boosted  
347 IL-17, IL-10 and TNF- $\alpha$  production independently of TCR crosslinking.  
348 Reinforcing the view that endogenous TLR4 ligands and LPS elicit distinct  
349 inflammatory outcomes<sup>26,56,57</sup>. To scope the pathophysiological role that  
350 endogenous TLR4 ligands might exert on the inflammatory program of synovial  
351 TLR4<sup>+</sup> T cells, we compared the cytokine profile of circulating and synovial TLR4<sup>+</sup>  
352 T cells *ex vivo*. In this approach, freshly obtained and donor paired blood and  
353 synovial fluid mononuclear cells were immediately labelled for IL-17, IL-10, TNF-  
354  $\alpha$  and IL-21 (Fig. 7 L-O). Due to intrinsic differences in autofluorescence in blood  
355 and synovial fluid samples, FMOs were calculated independently for blood and  
356 for synovial fluid T cells. In all donors, *ex vivo* IL-17 production by TLR4<sup>+</sup> T cells  
357 was higher in the synovium than in the blood (Fig. 7L). Curiously, IL-10 production  
358 is more prevalent in blood than in synovial TLR4<sup>+</sup> T cells (Fig. 7M). Lastly, in our  
359 sampling we did not detect neither TNF- $\alpha$  nor IL-21 production by blood nor  
360 synovial TLR4<sup>+</sup> T cells, *ex vivo*.

361 Altogether our results indicate that direct TLR4 engagement by endogenous  
362 ligands in synovial fluid favors the production of IL-17, IL-10 and TNF- $\alpha$ , but not  
363 IL-21. In contrast with LPS, endogenous synovial TLR4 ligands reprogram TLR4<sup>+</sup>  
364 T cells inflammatory profile independently of TCR engagement. Lastly, cytokine  
365 production by synovial TLR4<sup>+</sup> T cells suggest a major role for IL-17 in their  
366 pathogenic function.

367

## 368 **Discussion**

369 RA is a chronic inflammatory disease where CD4<sup>+</sup> T cells and joint tissue  
370 dysregulation synergize in propagating chronic inflammation and articular  
371 destruction. Treatment of RA remains challenging as identity of CD4<sup>+</sup> T cell  
372 population driving RA and the mechanism by which joint microenvironment  
373 impinges dysregulated T cell activation remain elusive. Here, we identified a  
374 circulating TLR4<sup>+</sup> T cell population which is enriched in synovial fluid of RA  
375 patients. TLR4<sup>+</sup> T cells are uniquely attuned to respond distinctly to different  
376 contextual cues. They reconcile an unique ability to potentially promote systemic  
377 antibody production with an synovial-driven tissue damage program. Our results  
378 highlight the contribution of spatial compartmentalization, including homotypic  
379 cell:cell contacts, to T cell driven pathogenicity and the role of tissue environment  
380 in tailoring site-specific T cell responses.

381 Tfh-like cell populations have been described in several chronic inflammatory  
382 diseases including in rheumatoid arthritis<sup>2</sup>, lupus nephritis<sup>58</sup> and systemic  
383 sclerosis<sup>59</sup>. In addition in RA, a population of IL-21 producing and antibody  
384 inducing peripheral helper T (Tph) cells has been identified<sup>12</sup>. Here we have  
385 identified a previously unknown Tfh-like population. TLR4<sup>+</sup> T cells were enriched  
386 in Tfh cell markers, CXCR5 and PD-1<sup>6-8</sup> and their frequency in circulation  
387 correlated with anti-CCP antibody levels. These sets of Tfh/Tph cells might  
388 indeed account for distinct cell populations or might represent the same cell  
389 population in different disease stages and/or response to treatment. Distinctly  
390 from previous reports<sup>2,12,58,59</sup>, we analyzed freshly obtained blood and synovial  
391 fluid samples, rather than frozen ones. Fresh samples facilitate the identification



392 of infrequent cell populations and the detection of certain markers and allow for  
393 a better detection of changes in cell size and shape.

394 Early descriptions of TLR4<sup>+</sup> T had similarly reported an increase in cell size<sup>60</sup>.  
395 Likewise, *in vitro* and *in vivo* experiments show that IL-17 producing cells have a  
396 bigger size which has been associated with increased cytokine secretion in  
397 *vitro*<sup>61</sup>. As TLR4<sup>+</sup> T cells FSC-A values were outside the conventional lymphocyte  
398 gate, we took care to exclude the occurrence of cell aggregates<sup>62</sup>. First, our  
399 doublet analysis (FSC-W vs FCS-A) into 2 distinct diagonals is suggestive of two  
400 cell populations rather than doublets. Second, confocal microscopy of FACS  
401 purified CD4<sup>+</sup> T cells (~99% purity) confirmed co-expression of TLR4 and CD3  
402 exclusively by HLA-DR<sup>+</sup>FSC-A<sup>high</sup> cells. TLR4 was expressed uniformly along the  
403 cell membrane, excluding the possibility of TLR4 acquisition through trogocytosis  
404 subsequent to prior interactions with APCs<sup>63</sup>. The ~25% increase in cell size  
405 combined with membrane projections likely underpins to the 2-fold increase in  
406 FSC-A value detected by flow cytometry. Increase in cell size accompanied by  
407 expression of activation markers CD38 and HLA-DR further argues that TLR4<sup>+</sup> T  
408 cells are indeed blasts.

409 HLA-DR are class II major histocompatibility molecules (MHC II) commonly  
410 present in APCs, where recognition of foreign-antigen bearing MHC by their  
411 cognate TCR on T cells drives antigen specific T cell activation<sup>33,64</sup>. HLA-DR  
412 haplotypes constitute the strongest genetic association with RA<sup>65</sup>. So far,  
413 research addressing this genetic association has focused on identifying the  
414 immunodominant peptide presented by HLA-DR on APCs driving dysregulated T  
415 cell activation in RA patients. Even though, several citrullinated candidate

416 peptides can be presented by HLA-DRB1<sup>66</sup>, the search for immunodominant T  
417 cell epitopes has so far revealed unfruitful. The observation that HLA-DR is  
418 expressed by activated T cells is longstanding<sup>34,35</sup>, including a recent  
419 identification of a HLA-DR<sup>+</sup> T cell subset in RA patients<sup>67</sup>. Nonetheless, the  
420 function of HLA-DR in T cells has remained enigmatic.

421 We unveiled for the first time a function for HLA-DR on T cells. By blocking  
422 MHCII:TCR interactions on FACS purified CD4<sup>+</sup> T cells with an anti-HLA-DR  
423 antibody, we uncovered that homotypic T-T cell interactions through non-cognate  
424 HLA-DR:TCR contacts regulate TLR4 surface expression on T cells. Homotypic  
425 T:T cell interactions have been described to be established through adhesion  
426 molecules<sup>68</sup> and to support T cell differentiation and enhancement of the immune  
427 response<sup>69</sup>. We have broadened the range of molecules involved in homotypic  
428 T:T cell interactions by identifying that they can be additionally established  
429 through non-cognate HLA-DR:TCR interactions. Non-cognate HLA-DR:TCR  
430 interactions between APCs and T cells are known to alter T cell genetic  
431 profile<sup>40,41</sup>. Thus, it is possible that homotypic T-T cell interactions through non-  
432 cognate HLA-DR:TCR contacts might drive TLR4 gene expression. Another  
433 possibility is that these homotypic HLA-DR:TCR interactions stabilize TLR4  
434 expression at the T cell plasma membrane. Further studies will be needed to  
435 dissect the mechanism by which homotypic HLA-DR:TCR interactions regulate  
436 TLR4 expression on T cells. It is possible that these homotypic HLA-DR:TCR  
437 interactions occur more frequently in the densely packed joint environment,  
438 where TLR4<sup>+</sup> T cells are enriched. Suggesting the enticing possibility that HLA-  
439 DR mediated homotypic interactions might sensitize for joint microenvironment  
440 recognition and for contextually driven shift of their pathological program.

441 TLR4 is a relatively promiscuous immune sensor that recognizes both microbial  
442 and endogenous ligands. In ankylosing spondylitis patients, CD28<sup>-</sup>TLR4<sup>+</sup> T cells  
443 with a senescent phenotype were found to be present in the blood but practically  
444 absent from affected joints<sup>39</sup>. This is in stark contrast with the TLR4<sup>+</sup> Tfh-like cell  
445 population reported here; TLR4<sup>+</sup> T cells were expanded in synovial fluid, and  
446 even though they were enriched for PD-1 they did not exhibit signs of wither  
447 exhaustion or senescence, as illustrated by their highly proliferative status and  
448 increased ability to produce cytokines in response to stimulation. In addition to  
449 CXCR5, TLR4<sup>+</sup> T cells also expressed the chemokine receptors CCR2 and CCR6  
450 indicating a preferential recruitment to inflamed tissues, which might account for  
451 their enrichment in the affected joints. Interestingly, TLR4 signaling has been  
452 reported to augment cell migration and invasiveness<sup>70,71</sup>, opening the possibility  
453 that direct TLR4 engagement could propel T cell invasiveness into affected joint.

454 In mice models of autoimmune diseases TLR4 signaling in CD4<sup>+</sup> T cells has been  
455 reported to function both as disease facilitator<sup>31</sup> and protector<sup>30</sup>. Nonetheless, a  
456 role for direct TLR4 engagement in T cell cytokine profile and function had not  
457 been reported so far. Our data show that while TCR engagement favors  
458 production of antibody inducing cytokine IL-21, TLR4 engagement by either LPS  
459 or synovial fluid components ensues IL-17, IL-10 and TNF- $\alpha$  production, cytokine  
460 whose role in RA has been ascribed to promoting joint damage<sup>15,19,49,50,59,61</sup>. Even  
461 though IL-10 is often labeled as an anti-inflammatory cytokine, it is well  
462 established that IL-10 has both immunosuppressive and stimulatory effects,  
463 including cytotoxic activity against tumors<sup>72</sup>. In RA, IL-10 has been reported to  
464 drive inflammatory arthritis and joint destruction<sup>73</sup>. The existence of an antibody-

465 independent pathogenic function for TLR4<sup>+</sup> T cells would explain why this  
466 population is also present in seronegative RA patients.

467 Curiously, while TLR4 engagement by LPS functions as a costimulatory signal  
468 boosting TCR signaling, TLR4 ligation by endogenous TLR4 ligands fuels TLR4<sup>+</sup>  
469 T cell inflammatory program independently of cognate antigen recognition.  
470 Distinct ligands ensuing different TLR4 responses is likely due to the fact that  
471 TLR4 has multiple binding sites<sup>55</sup>. In fact, TLR4 ligation by endogenous ligands  
472 Tenascin-C and fibronectin is not blocked by an LPS mimetic, which blocks TLR4  
473 activation by competing with LPS for TLR4/MD-2 binding<sup>26,74</sup>. In addition, gene  
474 expression profiles induced by hyaluronan and tenascin-C are significantly  
475 different from that induced by LPS<sup>26,56,57</sup>. Even though, we cannot formally  
476 exclude that other components present in the synovial fluid might affect T cell  
477 function, blocking of TLR4 in the presence of synovial fluid completely abrogated  
478 IL-17, IL-10 and TNF- $\alpha$  production. Thus, we can conclude that the production of  
479 IL-17, IL-10 and TNF- $\alpha$  induced by synovial fluid is specifically mediated by TLR4  
480 on T cells. It is likely that these TLR4 sponsored effects are mediated by the  
481 combined action of several endogenous TLR4 ligands present in the joints.

482 Importantly, *ex vivo* freshly analyzed synovial TLR4<sup>+</sup> T cells seemed to be  
483 skewed toward IL-17 production. When compared to *in vitro* stimulation with cell-  
484 depleted synovial fluid, synovial TLR4<sup>+</sup> T cells seemed to be poised to produce  
485 more IL-17, less IL-10 and no TNF- $\alpha$ . These differences might be due to the fact  
486 that to release cells from synovial fluid, it is necessary to degrade it enzymatically.  
487 Hyaluronidase digestion could give rise to additional TLR4 ligands that could be  
488 more adept at inducing IL-10 and TNF- $\alpha$  in *in vitro* restimulation assays. In

489 particular, different molecular weight hyaluronic acid fragments are known to elicit  
490 distinct inflammatory profiles<sup>75</sup>. It is possible that in vivo, IL-17 is the main  
491 cytokine induced by direct engagement of TLR4 on synovial T cells, where it  
492 might play a prominent role in mediating bone erosions and cartilage damage<sup>76,77</sup>.

493 Our study recruited a considerable RA patient cohort of 103 patients.  
494 Nonetheless, there are some limitations to our study. We could only obtain a  
495 relatively modest number of synovial fluid samples. This was due to the fact that  
496 we only used freshly obtained synovial fluid whose access to was seriously  
497 hindered during this last year COVID-19 pandemic imposed serious restrictions  
498 on hospital access to chronic patients. Another limitation was that most of the  
499 patients recruited were either in remission or presented controlled disease and  
500 thus had very low DAS scores, which made difficult to correlate the frequency of  
501 TLR4<sup>+</sup> T cells with disease activity. Despite these limitations, TLR4<sup>+</sup> T cells in the  
502 blood and synovial fluids correlated well indicating that the blood can be used to  
503 probe TLR4<sup>+</sup> T cell synovial enrichment. In addition, our functional assays were  
504 robust identifying a causal relationship linking TLR4<sup>+</sup> T cells selective recognition  
505 of joint tissue environment to the type immune profile ensued. Further studies will  
506 be needed to address the impact of TLR4<sup>+</sup> T cells in joint damage.

507 Deciphering which CD4<sup>+</sup> T cells are relevant to the disease process and they  
508 interplay with the joint microenvironment is a critical hurdle to our understanding  
509 of RA. Here we propose a mechanism by which the joint tissue microenvironment  
510 might reset on TLR4<sup>+</sup> T cells pathological function. Outside the joints, TLR4<sup>+</sup> Tfh-  
511 like cells will be activated predominantly through the TCR leading to the  
512 production of IL-21, which favors antibody production and will likely contribute to

513 anti-CCP antibody titers (Fig. 8). Within in the affected joints homotypic T:T cell  
514 interactions mediated through non-cognate HLA-DR:TCR coupling supports  
515 TLR4 surface expression. In turn, direct sensing of joint damage patterns by  
516 TLR4<sup>+</sup> T cells reprograms them towards an IL-17 pathological program that drives  
517 and sustains cartilage damage and bone erosions (Fig.8). This two-prong  
518 mechanism could highlight several attractive therapeutic targets both at the  
519 systemic level and in the affected tissues. In addition, circulating TLR4<sup>+</sup> T cells  
520 could constitute a good biomarker to predict flares and possibly which patients  
521 are more likely to develop cartilage damage and joint erosions.

522

### 523 **Acknowledgements**

524 We thank Cláudia Andrade for technical support and Juliana Gonçalves for  
525 testing samples for SARS-CoV-2 exposure. We are extremely grateful to all the  
526 participants of the study and to the whole rheumatology department at Hospital  
527 Egas Moniz that made this study possible. This work was supported  
528 by FCT grant (PTDC/MEC-REU/29520/2017 to H.S.) and by iNOVA4Health  
529 (Grant UID/Multi/04462 to HS). HS is supported by Fundação para  
530 a Ciência e Tecnologia (FCT) under the FCT Investigator Program  
531 (IF/01722/2013) and by H2020-WIDESPREAD-01-2016-2017-TeamingPhase2 -  
532 739572 - THE DISCOVERIES CTR, DAS and RCT were supported by FCT  
533 through PD/BD/137409/2018 and UID/Multi/04462, respectively.

534

### 535 **Author contributions**

536 DAS and RCT designed and performed experiments. DAS analyzed the data. RT  
537 collected clinical data. AN, IS, SF, MC, NPG, RT, MJG recruited patients and

538 provided blood and synovial recruited patients, provided blood and synovial fluid  
539 samples. ABS, CL, MM, MHL, PA, SM, TC, WC recruited patients and provided  
540 blood samples. FPS and AFM recruited patients, provided blood samples, and  
541 discussed clinical data. JCB advised, analyzed and interpreted clinical data.  
542 HS conceived the project, designed and performed experiments, supervised the  
543 project, analyzed the data and wrote the manuscript. All authors discussed the  
544 results and commented on the manuscript.

545

#### 546 **Competing interests**

547 The authors declare no competing interests.

548

#### 549 **METHODS**

##### 550 **Human samples**

551 The Ethics Committee of NOVA Medical School and of Hospital Egas Moniz  
552 approved this study. Informed consent was obtained from RA patients that  
553 fulfilled ACR 2010 classification criteria. Rheumatoid factor status, C-reactive  
554 protein level, erythrocyte sedimentation rate and medication usage were obtained  
555 by review of medical records. Anti-CCP antibody titers were determined at the  
556 time of blood draw using a commercial assay anti-CCP ELISA (IgG) from  
557 EUROIMMUN with a positive result defined as >5RU/mL. Number of swollen  
558 and/or tender joints was measured by attending clinician on the day of sample  
559 acquisition. Treatments are categorized in: non-steroid anti-inflammatory  
560 (NSAID), corticosteroids, disease modifying antirheumatic drugs (DMARDs) and  
561 biological DMARDs (dDMARDs). Blood was drawn by venipuncture into Lithium-  
562 Heparin containing cell preparation tubes (BD, Vacutainer). Synovial fluid was

563 collected only when excess material from patients undergoing diagnostic or  
564 therapeutic arthrocentesis. Demographic and clinical data for all the patients  
565 enrolled in this study are listed in Table S1.

566

567

#### 568 **Peripheral blood and synovial fluid cell isolation**

569 Blood samples and synovial fluid were processed within 2 hours of collection and  
570 freshly analyzed. Peripheral blood and synovial mononuclear cells were isolated  
571 by density gradient centrifugation (Biocoll, Merck Millipore) or following enzymatic  
572 digestion with hyaluronidase (10 $\mu$ L/mL; 30min at 37°C), respectively. Plasma and  
573 cell-depleted synovial fluid were frozen until further use.

574

#### 575 **Antibodies and flow cytometry**

576 For flow cytometry analysis peripheral blood cells were stained with antibodies  
577 listed in Table S2. For cell viability, Fixable Viability Dye (eBioscience) or Calcein  
578 Violet-AM (Biolegend) were used. When described, cells were cultured overnight  
579 with 10  $\mu$ g/mL of anti-HLA-DR antibody (L243). For intracellular staining cells  
580 were treated with Transcriptional Factor Fixation/Permeabilization kit  
581 (ebioscience). FACS acquisition was performed in a BD FACSCanto II instrument  
582 (BD Biosciences) and further analyzed with FlowJo v10.7.1 software.

583

#### 584 **Cell sorting and intracellular cytokine staining**

585 For flow cytometry cell sorting, cells were stained with anti-CD4 (RPA-T4) and  
586 anti-CD3 (SK7) antibodies (BioLegend) or with anti-CD4 (RPA-T4), anti-CD3  
587 (SK7), anti-HLA-DR (L243). Gating strategies are depicted in Fig. S1 A, B. Sorted



588 populations cell purity was routinely >98% (Fig. S1C). For intracellular cytokines  
589 assays sorted CD3<sup>high</sup>CD4<sup>high</sup>, rested for at least 3h, were stimulated with 5 µg/mL  
590 of anti-CD3 (UCHT1, BioLegend) and 2 µg/mL of anti-ICOS (C398.4A,  
591 BioLegend), crosslinked with 5 µg/mL anti-mouse IgG1 (BioLegend) plus 10  
592 µg/mL anti-hamster IgG (Thermo Fisher Scientific) at 37°C in the presence of  
593 Brefeldin-A (Life Technologies) for 14 h. Cells were fixed in paraformaldehyde  
594 1% (Sigma-Aldrich) and permeabilized with saponin (Carl Roth). Antibodies used  
595 are listed in Table S2. When indicated 1.7 µg/mL LPS (Sigma-Aldrich) or cell-  
596 depleted synovial fluid (SF) was added. For TLR4 blocking, CLI-095 (InvivoGen)  
597 was added at 10 µg/mL 1h before stimulation. Cell sorting was performed in a BD  
598 FACS Aria III instrument (BD Biosciences).

599

#### 600 **Imaging, image processing, and quantification**

601 FACS-purified CD3<sup>high</sup>CD4<sup>high</sup>HLA-DR<sup>+</sup> cells were immediately plated onto poly-  
602 L-lysine-coated coverslips, fixed in 4% paraformaldehyde for 15 min at room  
603 temperature, incubated with blocking buffer (PBS BSA 1%) and immunostained  
604 as previously described<sup>33,78</sup>. Antibodies used for immunofluorescence staining  
605 are described in Table S2. Confocal images were obtained using a Zeiss LSM  
606 710 confocal microscope (Carl Zeiss) over a 63x objective. Z stack optical  
607 sections were acquired at 0.2 µm depth increments, and both green and red laser  
608 excitation were intercalated to minimize crosstalk between the acquired  
609 fluorescence channels. 3D image deconvolution was performed using Huygens  
610 Essential 19.10, and 2D images were generated from a maximum intensity  
611 projection over a 3D volume cut of 0.4-µm depth centered on the cell medium

612 plane using Imaris. For quantification of cell size and roundness, confocal images  
613 were acquired at 2- $\mu$ m increments in the z-axis.

614

### 615 **Flow Cytometry Data analysis**

616 Flow cytometry data was analyzed using FlowJo and pluggins DownSample and  
617 FlowAI. The flow cytometry data was compensated at the time of acquisition with  
618 UltraComp eBeads (Thermo Fisher). As controls unstained and fluorescence  
619 minus one (FMO) conditions were included. The data collected in .fcs files was  
620 analyzed so that all abnormal events would be excluded by using FlowAI (Gianni  
621 Monaco et al. flowAI: automatic and interactive anomaly discerning tools for flow  
622 cytometry data. Bioinformatics 2016, 1-8

623 <https://doi.org/10.1093/bioinformatics/btw191>). Then, by using the gating  
624 strategies mentioned in the figures, dead cells and doublets were excluded.

625 Whenever mentioned  $\Delta$ MFI was calculated by subtracting the Fluorescence  
626 Minus One (FMO) FMO from MFI for any given fluorophore being analyzed. t-  
627 SNE maps were generated by pooling patients. Every heatmap represents  
628 differential marker expression between TLR4<sup>+</sup> cells (dashed gate) and remaining  
629 CD4<sup>+</sup> T cell populations. To maintain the consistency of the events from each  
630 condition and also to reduce the number of events fed into t-SNE algorithm,  
631 DownSample was used and files were concatenated in a way that all  
632 conditions/donors could be represented in the same plot.

633

### 634 **Statistical analysis**

635 Results are presented as medians. GraphPad Prism v8.4.2 software was used  
636 for statistical analysis. To test the normality of the data, D'Agostino & Pearson

637 normality test was used. In two groups comparison: for paired data, Paired t-test  
638 or Wilcoxon matched-pairs signed rank test was used; for unpaired data, Mann-  
639 Whitney test was used. For multiple groups comparison: for unpaired data  
640 Krustall-Wallis test with posttest Dunn's multiple comparisons; for paired data,  
641 RM one-way ANOVA with posttest Turkey's multiple comparisons or Friedman  
642 test with posttest Dunn's multiple comparisons were used as indicated. For  
643 correlations Pearson or Spearman was used as described. Results were  
644 considered significant at \* $p < 0.05$ , \*\* $p < 0.01$ , \*\*\* $p < 0.001$ , \*\*\*\* $p < 0.0001$ .

645

## 646 **References**

- 647 1. McInnes, I. B. & Schett, G. The pathogenesis of rheumatoid arthritis.  
648 *N Engl J Med* **365**, 2205–2219 (2011).
- 649 2. Chemin, K., Gerstner, C. & Malmström, V. Effector Functions of CD4+  
650 T Cells at the Site of Local Autoimmune Inflammation—Lessons From  
651 Rheumatoid Arthritis. *Front. Immunol.* **10**, 18001–15 (2019).
- 652 3. Song, W. & Craft, J. T follicular helper cell heterogeneity: Time, space,  
653 and function. *Immunol. Rev.* **288**, 85–96 (2019).
- 654 4. Ise, W. *et al.* T Follicular Helper Cell-Germinal Center B Cell  
655 Interaction Strength Regulates Entry into Plasma Cell or Recycling  
656 Germinal Center Cell Fate. *Immunity* **48**, 702–715.e4 (2018).
- 657 5. Schmitt, N. & Ueno, H. Blood Tfh Cells Come with Colors. *Immunity*  
658 **39**, 629–630 (2013).
- 659 6. Morita, R. *et al.* Human Blood CXCR5+CD4+ T Cells Are  
660 Counterparts of T Follicular Cells and Contain Specific Subsets that

- 661 Differentially Support Antibody Secretion. *Immunity* **34**, 108–121  
662 (2011).
- 663 7. Chevalier, N. *et al.* CXCR5 Expressing Human Central Memory CD4  
664 T Cells and Their Relevance for Humoral Immune Responses.  
665 *J.Immunol.* **186**, 5556–5568 (2011).
- 666 8. Locci, M. *et al.* Human Circulating PD-1+CXCR3-CXCR5+ Memory  
667 Tfh Cells Are Highly Functional and Correlate with Broadly  
668 Neutralizing HIV Antibody Responses. *Immunity* **39**, 758–769 (2013).
- 669 9. Ueno, H. T follicular helper cells in human autoimmunity. *Current*  
670 *Opinion in Immunology* **43**, 24–31 (2016).
- 671 10. Ma, J. *et al.* Increased frequency of circulating follicular helper T cells  
672 in patients with rheumatoid arthritis. *Clinical and Developmental*  
673 *Immunology* **2012**, 827480 (2012).
- 674 11. Rao, D. A. T Cells That Help B Cells in Chronically Inflamed Tissues.  
675 *Front. Immunol.* **9**, 621–13 (2018).
- 676 12. Rao, D. A. *et al.* Pathologically expanded peripheral T helper cell  
677 subset drives B cells in rheumatoid arthritis. *Nature* **542**, 110–114  
678 (2017).
- 679 13. Lubberts, E. *et al.* Treatment with a neutralizing anti-murine  
680 interleukin-17 antibody after the onset of collagen-induced arthritis  
681 reduces joint inflammation, cartilage destruction, and bone erosion.  
682 *Arthritis Rheum* **50**, 650–659 (2004).
- 683 14. Adamopoulos, I. E. *et al.* Interleukin-17A upregulates receptor  
684 activator of NF-kappaB on osteoclast precursors. *Arthritis Res. Ther.*  
685 **12**, R29–11 (2010).

- 686 15. Lubberts, E. The IL-23-IL-17 axis in inflammatory arthritis. *Nature*  
687 *Reviews Rheumatology* **11**, 415–429 (2015).
- 688 16. Agarwal, S. K. *et al.* Predictors of Discontinuation of Tumor Necrosis  
689 Factor Inhibitors in Patients with Rheumatoid Arthritis. *The Journal of*  
690 *Rheumatology* **35**, 1737–1744 (2008).
- 691 17. Koenders, M. I. *et al.* Blocking of interleukin-17 during reactivation of  
692 experimental arthritis prevents joint inflammation and bone erosion by  
693 decreasing RANKL and interleukin-1. *Am. J. Pathol.* **167**, 141–149  
694 (2005).
- 695 18. Hueber, W. *et al.* Effects of AIN457, a fully human antibody to  
696 interleukin-17A, on psoriasis, rheumatoid arthritis, and uveitis. *Sci*  
697 *Transl Med* **2**, 52ra72–52ra72 (2010).
- 698 19. Robert, M. & Miossec, P. IL-17 in Rheumatoid Arthritis and Precision  
699 Medicine: From Synovitis Expression to Circulating Bioactive Levels.  
700 *Front. Med.* **5**, 763–10 (2019).
- 701 20. Harrison, O. J. *et al.* Commensal-specific T cell plasticity promotes  
702 rapid tissue adaptation to injury. *Science* **363**, eaat6280–13 (2019).
- 703 21. Wang, Y. *et al.* TLR4 rs41426344 increases susceptibility of  
704 rheumatoid arthritis (RA) and juvenile idiopathic arthritis (JIA) in a  
705 central south Chinese Han population. *Pediatr Rheumatol Online J*  
706 **15**, 12–8 (2017).
- 707 22. Abdollahi-Roodsaz, S. *et al.* Shift from toll-like receptor 2 (TLR-2)  
708 toward TLR-4 dependency in the erosive stage of chronic  
709 streptococcal cell wall arthritis coincident with TLR-4-mediated  
710 interleukin-17 production. *Arthritis Rheum* **58**, 3753–3764 (2008).

- 711 23. Abdollahi-Roodsaz, S. *et al.* Local Interleukin-1-Driven Joint  
712 Pathology Is Dependent on Toll-Like Receptor 4 Activation. *Am. J.*  
713 *Pathol.* **175**, 2004–2013 (2010).
- 714 24. Pierer, M., Wagner, U., Rossol, M. & Ibrahim, S. Toll-Like Receptor 4  
715 Is Involved in Inflammatory and Joint Destructive Pathways in  
716 Collagen-Induced Arthritis in DBA1J Mice. *PLoS ONE* **6**, e23539–6  
717 (2011).
- 718 25. Kiyeko, G. W. *et al.* Spatiotemporal expression of endogenous TLR4  
719 ligands leads to inflammation and bone erosion in mouse collagen-  
720 induced arthritis. *Eur. J. Immunol.* **46**, 2629–2638 (2016).
- 721 26. Midwood, K. *et al.* Tenascin-C is an endogenous activator of Toll-like  
722 receptor 4 that is essential for maintaining inflammation in arthritic  
723 joint disease. *Nature Medicine* **15**, 774–780 (2009).
- 724 27. Ospelt, C. *et al.* Overexpression of toll-like receptors 3 and 4 in  
725 synovial tissue from patients with early rheumatoid arthritis: Toll-like  
726 receptor expression in early and longstanding arthritis. *Arthritis*  
727 *Rheum* **58**, 3684–3692 (2008).
- 728 28. Zanin-Zhorov, A. *et al.* Cutting Edge: T Cells Respond to  
729 Lipopolysaccharide Innately via TLR4 Signaling. *J. Immunol.* **179**, 41–  
730 44 (2007).
- 731 29. Cairns, B., Maile, R., Barnes, C. M., Frelinger, J. A. & Meyer, A. A.  
732 Increased Toll-Like Receptor 4 Expression on T Cells May Be a  
733 Mechanism for Enhanced T cell Response Late After Burn Injury. *The*  
734 *Journal of Trauma: Injury, Infection, and Critical Care* **61**, 293–299  
735 (2006).

- 736 30. González Navajas, J. M. *et al.* TLR4 signaling in effector CD4+ T cells  
737 regulates TCR activation and experimental colitis in mice. *J. Clin.*  
738 *Invest.* **120**, 570–581 (2010).
- 739 31. Reynolds, J. M. *et al.* Toll-like receptor 4 signaling in T cells promotes  
740 autoimmune inflammation. *PNAS.* **109**, 13064-13069
- 741 32. Kampstra, A. S. B. & Toes, R. E. M. HLA class II and rheumatoid  
742 arthritis: the bumpy road of revelation. *Immunogenetics* **69**, 597–603  
743 (2017).
- 744 33. Soares, H. *et al.* Regulated vesicle fusion generates signaling  
745 nanoterritories that control T cell activation at the immunological  
746 synapse. *J Exp Med* **210**, 2415–2433 (2013).
- 747 34. Yu, D. T. *et al.* Peripheral blood Ia-positive T cells. Increases in certain  
748 diseases and after immunization. *J Exp Med* **151**, 91–100 (1980).
- 749 35. Ko, H. S., Fu, S. M., Winchester, R. J., Yu, D. T. & Kunkel, H. G. Ia  
750 determinants on stimulated human T lymphocytes. Occurrence on  
751 mitogen- and antigen-activated T cells. *J Exp Med* **150**, 246–255  
752 (1979).
- 753 36. Li, X., Xu, T., Wang, Y., Huang, C. & Li, J. Toll-like receptor-4  
754 signaling: a new potential therapeutic pathway for rheumatoid  
755 arthritis. *Rheumatol Int* **34**, 1613–1614 (2014).
- 756 37. Huang, Q.-Q. & Pope, R. M. The role of Toll-like receptors in  
757 rheumatoid arthritis. *Curr Rheumatol Rep* **11**, 357–364 (2009).
- 758 38. Hudrisier, D., Riond, J., Mazarguil, H., Gairin, J. E. & Joly, E. Cutting  
759 edge: CTLs rapidly capture membrane fragments from target cells in

- 760 a TCR signaling-dependent manner. *J.Immunol.* **166**, 3645–3649  
761 (2001).
- 762 39. Raffeiner, B. *et al.* Between adaptive and innate immunity: TLR4-  
763 mediated perforin production by CD28null T-helper cells in ankylosing  
764 spondylitis. *Arthritis Res. Ther.* **7**, R1412–20 (2005).
- 765 40. Myers, D. R., Zikherman, J. & Roose, J. P. Tonic Signals: Why Do  
766 Lymphocytes Bother? *Trends Immunol.* **38**, 844–857 (2017).
- 767 41. Milam, A. A. V. *et al.* Tonic TCR Signaling Inversely Regulates the  
768 Basal Metabolism of CD4+ T Cells. *Immunohorizons* **4**, 485–497  
769 (2020).
- 770 42. Edner, N. M. *et al.* Follicular helper T cell profiles predict response to  
771 costimulation blockade in type 1 diabetes. *Nat Immunol* **21**, 1244–  
772 1255 (2020).
- 773 43. Vergunst, C. E. *et al.* Modulation of CCR2 in rheumatoid arthritis: A  
774 double-blind, randomized, placebo-controlled clinical trial. *Arthritis*  
775 *Rheum* **58**, 1931–1939 (2008).
- 776 44. Ruth, J. H. *et al.* Role of Macrophage Inflammatory Protein-3 $\alpha$  and Its  
777 Ligand CCR6 in Rheumatoid Arthritis. *Lab Invest* **83**, 579–588 (2003).
- 778 45. Hirota, K. *et al.* Preferential recruitment of CCR6-expressing Th17  
779 cells to inflamed joints via CCL20 in rheumatoid arthritis and its animal  
780 model. *J Exp Med* **204**, 2803–2812 (2007).
- 781 46. Chung, Y. *et al.* Critical Regulation of Early Th17 Cell Differentiation  
782 by Interleukin-1 Signaling. *Immunity* **30**, 576–587 (2009).



- 783 47. Chang, S. H. *et al.* Interleukin-17C Promotes Th17 Cell Responses  
784 and Autoimmune Disease via Interleukin-17 Receptor E. *Immunity* **35**,  
785 611–621 (2011).
- 786 48. Chavele, K.-M., Merry, E. & Ehrenstein, M. R. Cutting edge:  
787 circulating plasmablasts induce the differentiation of human T  
788 follicular helper cells via IL-6 production. *J. Immunol.* **194**, 2482–2485  
789 (2015).
- 790 49. Hirota, K. *et al.* Autoimmune Th17 Cells Induced Synovial Stromal  
791 and Innate Lymphoid Cell Secretion of the Cytokine GM-CSF to  
792 Initiate and Augment Autoimmune Arthritis. *Immunity* **48**, 1220–  
793 1232.e5 (2018).
- 794 50. Noack, M., Beringer, A. & Miossec, P. Additive or Synergistic  
795 Interactions Between IL-17A or IL-17F and TNF or IL-1 $\beta$  Depend on  
796 the Cell Type. *Front. Immunol.* **10**, 230–12 (2019).
- 797 51. Baillet, A. *et al.* Synovial fluid proteomic fingerprint: S100A8, S100A9  
798 and S100A12 proteins discriminate rheumatoid arthritis from other  
799 inflammatory joint diseases. *Rheumatology (Oxford)* **49**, 671–682  
800 (2010).
- 801 52. Choi, I. Y. *et al.* MRP8/14 serum levels as a strong predictor of  
802 response to biological treatments in patients with rheumatoid arthritis.  
803 *Annals of the Rheumatic Diseases* **74**, 499–505 (2015).
- 804 53. Page, T. H. *et al.* Raised circulating tenascin-C in rheumatoid arthritis.  
805 *Arthritis Res. Ther.* **14**, R260–9 (2012).
- 806 54. Park, S. Y. *et al.* HMGB1 induces angiogenesis in rheumatoid arthritis  
807 via HIF-1 $\alpha$  activation. *Eur. J. Immunol.* **45**, 1216–1227 (2015).

- 808 55. Zuliani-Alvarez, L. *et al.* Mapping tenascin-C interaction with toll-like  
809 receptor 4 reveals a new subset of endogenous inflammatory triggers.  
810 *Nature Communications* **8**, 1595 (2017).
- 811 56. Taylor, K. R. *et al.* Recognition of hyaluronan released in sterile injury  
812 involves a unique receptor complex dependent on Toll-like receptor  
813 4, CD44, and MD-2. *J. Biol. Chem.* **282**, 18265–18275 (2007).
- 814 57. Silva, E. *et al.* HMGB1 and LPS induce distinct patterns of gene  
815 expression and activation in neutrophils from patients with sepsis-  
816 induced acute lung injury. *Intensive Care Med* **33**, 1829–1839 (2007).
- 817 58. Liarski, V. M. *et al.* Cell distance mapping identifies functional T  
818 follicular helper cells in inflamed human renal tissue. *Sci Transl Med*  
819 **6**, 230ra46–230ra46 (2014).
- 820 59. Taylor, D. K. *et al.* T follicular helper-like cells contribute to skin  
821 fibrosis. *Sci Transl Med* **10**, eaaf5307 (2018).
- 822 60. Castro, A., Bemer, V., Nóbrega, A., Coutinho, A. & Truffa-Bachi, P.  
823 Administration to mouse of endotoxin from gram-negative bacteria  
824 leads to activation and apoptosis of T lymphocytes. *Eur. J. Immunol.*  
825 **28**, 488–495 (1998).
- 826 61. Zrioual, S. *et al.* Genome-Wide Comparison between IL-17A- and IL-  
827 17F-Induced Effects in Human Rheumatoid Arthritis Synoviocytes.  
828 *J.I.* **182**, 3112–3120 (2009).
- 829 62. Burel, J. G. *et al.* The Challenge of Distinguishing Cell–Cell  
830 Complexes from Singlet Cells in Non-Imaging Flow Cytometry and  
831 Single-Cell Sorting. *Cytometry* **8**, e46045–9 (2020).

- 832 63. Joly, E. & Hudrisier, D. What is trogocytosis and what is its purpose?  
833 *Nat Immunol* **4**, 815–815 (2003).
- 834 64. Soares, H. *et al.* A subset of dendritic cells induces CD4<sup>+</sup> T cells to  
835 produce IFN-gamma by an IL-12-independent but CD70-dependent  
836 mechanism in vivo. *J Exp Med* **204**, 1095–1106 (2007).
- 837 65. The Wellcome Trust Case Control Consortium. Genome-wide  
838 association study of 14,000 cases of seven common diseases and  
839 3,000 shared controls. *Nature* **447**, 661–678 (2007).
- 840 66. Scally, S. W. *et al.* A molecular basis for the association of the HLA-  
841 DRB1 locus, citrullination, and rheumatoid arthritis. *J Exp Med* **210**,  
842 2569–2582 (2013).
- 843 67. Fonseka, C. Y. *et al.* Mixed-effects association of single cells identifies  
844 an expanded effector CD4<sup>+</sup> T cell subset in rheumatoid arthritis. *Sci*  
845 *Transl Med* **10**, eaaq0305 (2018).
- 846 68. Sabatos, C. A. *et al.* A Synaptic Basis for Paracrine Interleukin-2  
847 Signaling during Homotypic T Cell Interaction. *Immunity* **29**, 238–248  
848 (2008).
- 849 69. Gérard, A. *et al.* Secondary T cell-T cell synaptic interactions drive the  
850 differentiation of protective CD8<sup>+</sup> T cells. *Nat Immunol* **14**, 356–363  
851 (2013).
- 852 70. Hwang, I.-Y., Park, C., Harrison, K. & Kehrl, J. H. TLR4 signaling  
853 augments B lymphocyte migration and overcomes the restriction that  
854 limits access to germinal center dark zones. *J Exp Med* **206**, 2641–  
855 2657 (2009).

- 856 71. Yang, H. *et al.* Toll-Like Receptor 4 Prompts Human Breast Cancer  
857 Cells Invasiveness via Lipopolysaccharide Stimulation and Is  
858 Overexpressed in Patients with Lymph Node Metastasis. *PLoS ONE*  
859 **9**, e109980–11 (2014).
- 860 72. Ouyang, W. & O'Garra, A. IL-10 Family Cytokines IL-10 and IL-22:  
861 from Basic Science to Clinical Translation. *Immunity* **50**, 871–891  
862 (2019).
- 863 73. Greenhill, C. J. *et al.* Interleukin-10 regulates the inflammasome-  
864 driven augmentation of inflammatory arthritis and joint destruction.  
865 *Arthritis Res. Ther.* **16**, 419–10 (2014).
- 866 74. Okamura, Y. *et al.* The Extra Domain A of Fibronectin Activates Toll-  
867 like Receptor 4. *J. Biol. Chem.* **276**, 10229–10233 (2001).
- 868 75. Cyphert, J. M., Trempus, C. S. & Garantzotis, S. Size Matters:  
869 Molecular Weight Specificity of Hyaluronan Effects in Cell Biology.  
870 *International Journal of Cell Biology* **2015**, 1–8 (2015).
- 871 76. Kotake, S. *et al.* IL-17 in synovial fluids from patients with rheumatoid  
872 arthritis is a potent stimulator of osteoclastogenesis. *J. Clin. Invest.*  
873 **103**, 1345–1352 (1999).
- 874 77. Chabaud, M. *et al.* Contribution of Interleukin 17 to Synovium Matrix  
875 Destruction in Rheumatoid Arthritis. *Cytokine* **12**, 1092–1099 (2000).
- 876 78. Silva, J. G., Martins, N. P., Henriques, R. & Soares, H. HIV-1 Nef  
877 Impairs the Formation of Calcium Membrane Territories Controlling  
878 the Signaling Nanoarchitecture at the Immunological Synapse. *J.I.*  
879 **197**, 4042–4052 (2016).
- 880

881 **Figure Legends**

882 **Figure 1- RA patients display a circulating TLR4<sup>+</sup> T cell population that is**  
883 **expanded in the synovial fluid.**

884 (A) Gating strategy and cumulative frequency of CD3<sup>+</sup>CD4<sup>+</sup>TLR4<sup>+</sup> cells in freshly  
885 obtained synovial fluid (n=9).

886 (B) Representative histogram and cumulative plot of relative cell size (FSC-A) in  
887 TLR4<sup>-</sup> (grey) and TLR4<sup>+</sup> (red) synovial fluid T cells (n=9).

888 (C) Representative histogram and cumulative plot of relative cell complexity  
889 (SSC-A) of TLR4<sup>-</sup> (grey) and TLR4<sup>+</sup> (red) synovial fluid T cells (n=9).

890 (D) Gating strategy and cumulative frequency of CD3<sup>+</sup>CD4<sup>+</sup>TLR4<sup>+</sup> cells in freshly  
891 obtained peripheral blood (n=100).

892 (E) Representative histogram and cumulative plot of relative cell size (FSC-A) in  
893 TLR4<sup>-</sup> (grey) and TLR4<sup>+</sup> (red) peripheral blood T cells (n=100).

894 (F) Representative histogram and cumulative plot of relative cell complexity  
895 (SSC-A) of TLR4<sup>-</sup> (grey) and TLR4<sup>+</sup> (red) peripheral blood T cells (n=100).

896 (G) Donor matched analysis of the frequency of TLR4 expression by CD3<sup>+</sup>CD4<sup>+</sup>  
897 T cells in peripheral blood (closed circles; PB) and in synovial fluid (open circles;  
898 SF) (n=9).

899 (H) Donor matched analysis of the MFI of TLR4 expression by CD3<sup>+</sup>CD4<sup>+</sup> T cells  
900 in peripheral blood (closed circles; PB) and in synovial fluid (open circles; SF)  
901 (n=9).

902 (I) Correlation between the frequency of CD3<sup>+</sup>CD4<sup>+</sup> TLR4<sup>+</sup> T cells in blood (PB)  
903 and in synovial fluid (SF) (n=9).

904 (J) t-SNE plots of peripheral blood total CD4<sup>+</sup> T cells. Color indicates cell  
905 expression levels of labelled marker (TLR4, HLA-DR and PD-1). Circle demarks  
906 TLR4<sup>+</sup> cells (n=26).

907 (K-N) Confocal microscopy of FACS-purified HLA-DR<sup>-</sup> and HLA-DR<sup>+</sup> CD4<sup>+</sup> T  
908 cells. (K) Cells were surface labelled for CD3 and TLR4, stained for DAPI and  
909 analyzed by 3D confocal microscopy. Bar, 5µm. (L) Cumulative graphs of 3D  
910 volume (M) larger diameter and (N) roundness index.

911 (O) t-SNE plots of peripheral blood total CD3<sup>+</sup>CD4<sup>+</sup> T cells. Color indicates cell  
912 expression levels of labelled marker (TLR4, Ki67 and CD38). Circle demarks  
913 TLR4<sup>+</sup> cells.

914 (P, Q) Representative dot plots and cumulative graphs of the frequency (P) and  
915 ΔMFI (Q) of Ki67 expression by TLR4<sup>-</sup> and TLR4<sup>+</sup> peripheral blood T cells (n=13  
916 RA donors).

917 (R, S) Representative dot plots and cumulative graphs of the frequency (R) and  
918 ΔMFI (S) of CD38 expression by TLR4<sup>-</sup> and TLR4<sup>+</sup> peripheral blood T cells  
919 (n=13).

920 ΔMFI was calculated to correct for the distinct autofluorescence of the TLR4<sup>-</sup> and  
921 TLR4<sup>+</sup> T cell populations. ΔMFI was calculated by subtracting the fluorescence  
922 intensity minus one (FMO) from median fluorescence intensity (MFI) for each  
923 given marker.

924 D'Agostino & Pearson normality test was performed. Shapiro-Wilk normality test  
925 was performed when n was too small for D'Agostino & Pearson normality testing.

926 p values \*\*\*\*p<0.0001, \*\*\*p<0.001, \*\*p<0.01, \*p<0.05 were determined by (B, G,  
927 P) Paired t-test; (C, E, F, H, Q, R, S) Wilcoxon matched-pairs rank test; (I)  
928 Pearson Correlation and (L, M, N) Mann-Whitney test.

929

930 **Figure 2- The frequency of TLR4<sup>+</sup> T correlates with anti-CCP antibody titers**  
931 **and age, independently of treatment.**

932 (A) Frequency of TLR4<sup>+</sup> T cells disaggregated by age (n=101; ≤65 years n=64;  
933 >65 years n=37).

934 (B) Frequency of TLR4<sup>+</sup> T cells disaggregated by sex (n=101; female n=86; male  
935 n=15).

936 (C) Frequency of TLR4<sup>+</sup> T cells disaggregated by factor rheumatoid (RF) status  
937 (n=88; RF<sup>+</sup> n=66; RF<sup>-</sup> n=22).

938 (D) Correlation between factor rheumatoid titers and frequency of TLR4<sup>+</sup> T cells  
939 in rheumatoid factor positive patients (n=66).

940 (E) Frequency of TLR4<sup>+</sup> T cells disaggregated by factor anti-CCP antibody status  
941 (n=96; CCP<sup>+</sup> n=71; CCP<sup>-</sup> n=25).

942 (F) Correlation between factor anti-CCP antibody titers and frequency of TLR4<sup>+</sup>  
943 T cells in CCP positive patients (n=71).

944 (G) Correlation between frequency of TLR4<sup>+</sup> T cells and DAS28 ESR score  
945 (n=83).

946 (H) Correlation between frequency of TLR4<sup>+</sup> T cells and DAS28 CRP score  
947 (n=83).

948 (I) Frequency of TLR4<sup>+</sup> T cells disaggregated by treatment family (N/S- NSAID  
949 and/or corticoids n=8; D- DMARDs n=81; bD- biological DMARDs n=12).

950 (J-P) Frequency of TLR4<sup>+</sup> T cells segregated by medication usage (n=101). (J)  
951 NSAIDs, (K) Corticosteroids, (L) Methotrexate, (M) Leflunomide, (N)  
952 Hydroxichloroquine, (O) Sulfasalazine, (P) biological DMARDs.

953 (Q) Correlation between DMARD treatment duration and frequency of TLR4<sup>+</sup> T  
954 cells (n=88).

955 D'Agostino & Pearson normality test was performed. p values \*\*\*\*p<0.0001,  
956 \*\*\*p<0.001, \*\*p<0.01, \*p<0.05 were determined by (A, B, C, E, J, K, L, M, N, O,  
957 P) Mann-Whitney test; (D, F, G, H) Spearman Correlation and (I) Krustall-Wallis  
958 test with posttest Dunn's multiple comparisons (N/S vs D and N/S vs bD  
959 <sup>ns</sup>p>0.9999 and D vs bD <sup>ns</sup>p=0.6963).

960

961 **Figure 3- Blocking HLA-DR abrogates TLR4 surface expression in T cells.**

962 (A) Representative plots and cumulative graph (n=99) of the frequency of HLA-  
963 DR<sup>+</sup>TLR4<sup>+</sup> T cells.

964 (B) Representative plots and cumulative graph (n=99) of the frequency of TLR4  
965 expression by HLA-DR<sup>+</sup> T cells.

966 (C) Representative plots and cumulative graph (n=99) of the frequency of HLA-  
967 DR expression by TLR4<sup>+</sup> T cells.

968 (D) Correlation between HLA-DR and TLR4 MFIs in TLR4<sup>+</sup> T cells (n=99).

969 (E) Representative plots and cumulative graph (n=17) of the frequency of TLR4<sup>+</sup>  
970 T cells after incubating FACS-purified CD4<sup>+</sup> T cells with a blocking antibody to  
971 HLA-DR for 18 hours.

972 D'Agostino & Pearson normality test was performed. p values \*\*\*\*p<0.0001,  
973 \*\*\*p<0.001, \*\*p<0.01, \*p<0.05 were determined by (D) Spearman Correlation and

974 (E) Wilcoxon matched-pairs rank test.

975

976 **Figure 4- TLR4<sup>+</sup> T cells have features of Tfh-like cells**



977 (A) t-SNE plots of peripheral blood total CD4<sup>+</sup> T cells. Color indicates cell  
978 expression levels of labelled marker (TLR4, CXCR5, ICOS and PD-1). Circle  
979 demarks TLR4<sup>+</sup> cells.

980 (B, C) Representative plots and cumulative analysis (n=13) of CXCR5 frequency  
981 (A) and  $\Delta$ MFI (B) in TLR4<sup>+</sup> (red) versus TLR4<sup>-</sup> (grey) T cells.

982 (D, E) Representative plots and cumulative analysis (n=13) of PD-1 frequency  
983 (D) and  $\Delta$ MFI (E) in TLR4<sup>+</sup> (red) versus TLR4<sup>-</sup> T cells (grey).

984 (F) Representative plots and cumulative analysis (n=13) of the frequency of  
985 CXCR5 and PD-1 co-expression TLR4<sup>+</sup> (red) versus TLR4<sup>-</sup> (grey) T cells.

986 (G, H) Representative plots and cumulative analysis (n=13) of ICOS frequency  
987 (G) and  $\Delta$ MFI (H) in TLR4<sup>+</sup> (red) versus TLR4<sup>-</sup> (grey) T cells.

988 (I) Representative plots and cumulative analysis (n=13) of the frequency of  
989 CXCR5 and ICOS co-expression in TLR4<sup>+</sup> (red) versus TLR4<sup>-</sup> (grey) T cells.

990 (J) Representative plots and cumulative analysis (n=13) of the frequency of ICOS  
991 and PD-1 co-expression TLR4<sup>+</sup> (red) versus TLR4<sup>-</sup> (grey) T cells.

992 (K) Correlation between the frequency of TLR4<sup>+</sup>CXCR5<sup>+</sup> T cells and TLR4<sup>-</sup>  
993 CXCR5<sup>+</sup> cells (n=13).

994 (L) Correlation between the frequency of TLR4<sup>+</sup>PD1<sup>+</sup> T cells and TLR4<sup>-</sup>PD1<sup>+</sup> cells  
995 (n=13).

996  $\Delta$ MFI was calculated to correct for the distinct autofluorescence of the TLR4<sup>-</sup> and  
997 TLR4<sup>+</sup> T cell populations.  $\Delta$ MFI was calculated by subtracting the fluorescence  
998 intensity minus one (FMO) from median fluorescence intensity (MFI) for each  
999 given marker.

1000 D'Agostino & Pearson normality test was performed. p values \*\*\*\*p<0.0001,  
1001 \*\*\*p<0.001, \*\*p<0.01, \*p<0.05 were determined by (B, C, D, E, F, H, I, J) Wilcoxon  
1002 matched-pairs rank test; (G) Paired t-test; (K, L) Pearson Correlation.

1003

1004 **Figure 5- TLR4<sup>+</sup> T cells display inflammatory chemokine and cytokine**  
1005 **receptors.**

1006 (A) t-SNE plots of peripheral blood total CD4<sup>+</sup> T cells. Color indicates cell  
1007 expression levels of labelled marker (TLR4, CCR2, CCR6, IL-1R). Circle demarks  
1008 TLR4<sup>+</sup> cells.

1009 (B, C) Representative plots and cumulative graph (n=12) of CCR2 frequency (B)  
1010 and  $\Delta$ MFI (C) in TLR4<sup>+</sup> (red) and TLR4<sup>-</sup> (grey) T cells.

1011 (D, E) Representative plots and cumulative graph (n=12) of CCR6 frequency (D)  
1012 and  $\Delta$ MFI (E) in TLR4<sup>+</sup> (red) and TLR4<sup>-</sup> (grey) T cells.

1013 (F-G) t-SNE plots of peripheral blood total CD4<sup>+</sup> T cells. Color indicates cell  
1014 expression levels of labelled marker. (F) TLR4, IL-6R. (G) TLR4, IL-17R and IL-  
1015 2R $\alpha$ . Circle demarks TLR4<sup>+</sup> cells.

1016 (H, I) Representative plots and cumulative graph (n=12) of IL-1R frequency (H)  
1017 and  $\Delta$ MFI (I) in TLR4<sup>+</sup> (red) and TLR4<sup>-</sup> (grey) T cells.

1018 (J, K) Representative plots and cumulative graph (n=13) of IL-6R frequency (J)  
1019 and  $\Delta$ MFI (K) in TLR4<sup>+</sup> (red) and TLR4<sup>-</sup> (grey) T cells.

1020 (L, M) Representative plots and cumulative graph (n=13) of IL-17R frequency (L)  
1021 and  $\Delta$ MFI (M) in TLR4<sup>+</sup> (red) and TLR4<sup>-</sup> (grey) T cells.

1022 (N, O) Representative plots and cumulative graph (n=13) of IL-2R $\alpha$  frequency (L)  
1023 and  $\Delta$ MFI (M) in TLR4<sup>+</sup> (red) and TLR4<sup>-</sup> (grey) T cells.

1024  $\Delta$ MFI was calculated to correct for the distinct autofluorescence of the TLR4<sup>-</sup> and  
1025 TLR4<sup>+</sup> T cell populations.  $\Delta$ MFI was calculated by subtracting the fluorescence  
1026 intensity minus one (FMO) from median fluorescence intensity (MFI) for each  
1027 given marker.

1028 D'Agostino & Pearson normality test was performed. p values \*\*\*\*p<0.0001,  
1029 \*\*\*p<0.001, \*\*p<0.01, \*p<0.05 were determined by (B, E, H, I, J, L, N, O) Wilcoxon  
1030 matched-pairs rank test; (C, D, K, M) Paired t-test.

1031

1032 **Figure 6- Direct recognition of LPS by TLR4<sup>+</sup> T cells reprograms their**  
1033 **cytokine program.**

1034 FACS-purified CD3<sup>high</sup>CD4<sup>high</sup> T cells from freshly obtained peripheral blood were  
1035 cultured for 18 hours and stimulated with either  $\alpha$ -CD3 and  $\alpha$ -ICOS (TCR ICOS);  
1036  $\alpha$ -CD3,  $\alpha$ -ICOS and LPS (TCR ICOS LPS); LPS alone; or left unstimulated (unst).

1037 (A, B) Frequency (A) and  $\Delta$ MFI (B) of IL-21 production by TLR4<sup>+</sup> T cells (n=11).

1038 (C, D) Frequency (C) and  $\Delta$ MFI (D) of IL-10 production by TLR4<sup>+</sup> T cells (n=11).

1039 (E, F) Frequency (E) and  $\Delta$ MFI (F) of TNF- $\alpha$  production by TLR4<sup>+</sup> T cells (n=5).

1040 (G, H) Frequency (G) and  $\Delta$ MFI (H) of IL-17 production by TLR4<sup>+</sup> T cells (n=12).

1041  $\Delta$ MFI was calculated by subtracting the fluorescence intensity minus one (FMO)  
1042 from median fluorescence intensity (MFI) for each given marker.

1043 D'Agostino & Pearson normality test was performed. p values \*\*\*\*p<0.0001,  
1044 \*\*\*p<0.001, \*\*p<0.01, \*p<0.05 were determined by (A, B, C, D, E, F, G) Friedman  
1045 test with posttest Dunn's multiple comparisons; (H) RM one-way ANOVA with  
1046 posttest Tukey's multiple comparisons.

1047

1048 **Figure 7- Direct recognition of TLR4 ligands present in synovial fluid drives**  
1049 **IL-17 production, independently of antigen recognition.**

1050 (A-C) Correlation between synovial fluid tenascin-C levels and DMARD duration  
1051 (A, n=5), frequency of circulating (PB) TLR4<sup>+</sup> T cells (B, n=7), and frequency of  
1052 synovial fluid (SF) TLR4<sup>+</sup> T cells (G, n=7).

1053 (D-G) FACS-purified CD3<sup>high</sup>CD4<sup>high</sup> T cells from peripheral blood were cultured  
1054 for 18 hours in the presence of medium (Med) or TLR4 signaling inhibitor (CLI-  
1055 095). Frequency and  $\Delta$ MFI of IL-17 (D, E) and IL-10 (F, G) production by TLR4<sup>+</sup>  
1056 T cells (n=6).

1057 (H-K) FACS-purified CD3<sup>high</sup>CD4<sup>high</sup> T cells from peripheral blood were cultured  
1058 for 18 hours in the presence of medium (Med), synovial fluid (SF) or TLR4  
1059 signaling inhibitor (CLI-095). Frequency IL-17 (H), IL-10 (I), TNF- $\alpha$  (J) and IL-21  
1060 (K) production by TLR4<sup>+</sup> T cells (n=2).

1061 (L-O) Ex vivo production of IL-17, IL-10, TNF- $\alpha$  and IL-21 by TLR4<sup>+</sup> T cells in n=3  
1062 freshly obtained peripheral blood (PB) and synovial fluid (SF) donor paired  
1063 samples.

1064  $\Delta$ MFI was calculated by subtracting the fluorescence intensity minus one (FMO)  
1065 from median fluorescence intensity (MFI) for each given marker. FMOs were  
1066 calculated independently for blood and synovial fluid FACS analysis.

1067 Shapiro-Wilk normality test was performed because the n was too small for  
1068 D'Agostino & Pearson normality testing. p values \*\*\*\*p<0.0001, \*\*\*p<0.001,  
1069 \*\*p<0.01, \*p<0.05 were determined by (A, B, C) Pearson Correlation; (D, E, F)  
1070 Wilcoxon matched-pairs rank test and (G) Paired t-test.

1071

1072 **Figure 8- Schematic representation of proposed mechanism and role of**  
1073 **TLR4<sup>+</sup> T cells in RA.**

1074 From top to bottom: a population of TLR4<sup>+</sup> Tfh-like T cells expanded in synovial  
1075 fluid of RA patients was characterized in a cohort of more than 100 RA patients.  
1076 We uncovered a function for HLA-DR expression by T cells, as homotypic T:T  
1077 cell contacts established through HLA-DR:TCR were found to be required for  
1078 TLR4 expression by T cells. TLR4<sup>+</sup> T cells display a two-pronged mechanism  
1079 uniquely poised to tailor their pathogenic phenotype in response to contextual  
1080 cues. Outside the joints, TCR driven IL-21 production favors antibody production,  
1081 which likely contributes to anti-CCP antibody titers. Within in the affected joints  
1082 direct sensing of joint damage patterns by TLR4<sup>+</sup> T cells reprograms them  
1083 towards an IL-17 pathological program known to drive and sustain cartilage  
1084 damage and bone erosions.

1085

1086 **Supplemental information**

1087 **Figure S1- FACS-purification strategy and sorted cell population purity.**

1088 (A) Flow cytometric sorting strategy for the purification of CD3<sup>high</sup>CD4<sup>high</sup>HLA-DR<sup>+</sup>  
1089 and CD3<sup>high</sup>CD4<sup>high</sup>HLA-DR<sup>-</sup> T cells.

1090 (B) Flow cytometric sorting strategy for the purification of CD3<sup>high</sup>CD4<sup>high</sup> T cells.

1091 (C) Purity of sorted CD3<sup>high</sup>CD4<sup>high</sup> T cells.

1092

1093

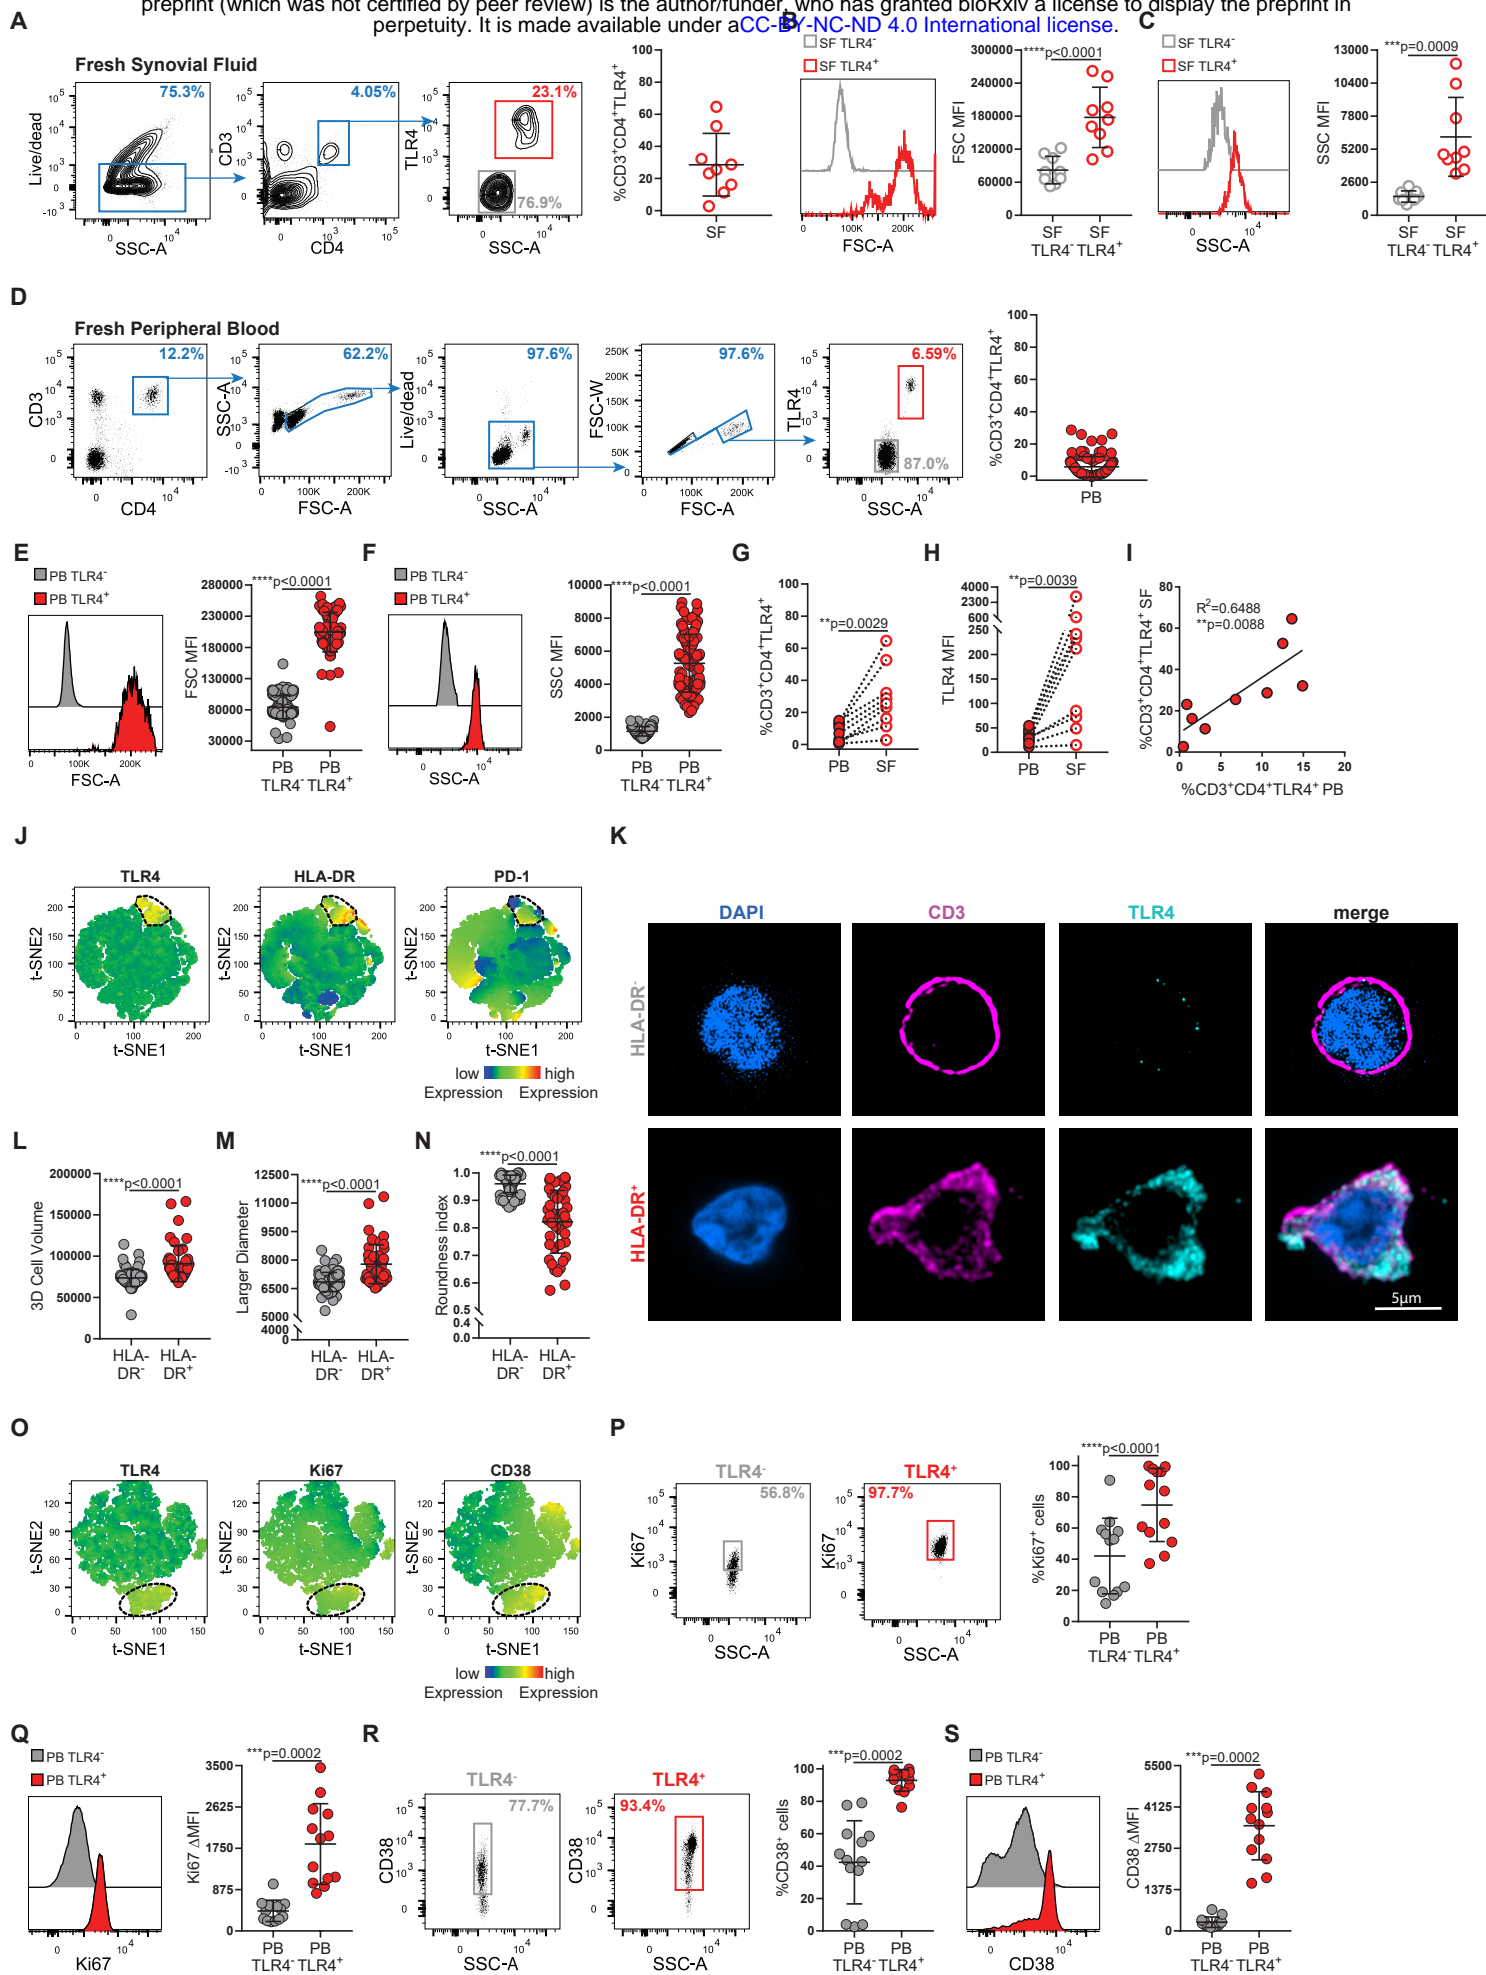

Figure 1

**Figure 1. RA patients display a circulating TLR4<sup>+</sup> T cell population that is expanded in the synovial fluid.**

- (A) Gating strategy and cumulative frequency of CD3<sup>+</sup>CD4<sup>+</sup>TLR4<sup>+</sup> cells in freshly obtained synovial fluid (n=9).
- (B) Representative histogram and cumulative plot of relative cell size (FSC-A) in TLR4<sup>-</sup> (grey) and TLR4<sup>+</sup> (red) synovial fluid T cells (n=9).
- (C) Representative histogram and cumulative plot of relative cell complexity (SSC-A) of TLR4<sup>-</sup> (grey) and TLR4<sup>+</sup> (red) synovial fluid T cells (n=9).
- (D) Gating strategy and cumulative frequency of CD3<sup>+</sup>CD4<sup>+</sup>TLR4<sup>+</sup> cells in freshly obtained peripheral blood (n=100).
- (E) Representative histogram and cumulative plot of relative cell size (FSC-A) in TLR4<sup>-</sup> (grey) and TLR4<sup>+</sup> (red) peripheral blood T cells (n=100).
- (F) Representative histogram and cumulative plot of relative cell complexity (SSC-A) of TLR4<sup>-</sup> (grey) and TLR4<sup>+</sup> (red) peripheral blood T cells (n=100).
- (G) Donor matched analysis of the frequency of TLR4 expression by CD3<sup>+</sup>CD4<sup>+</sup> T cells in peripheral blood (closed circles; PB) and in synovial fluid (open circles; SF) (n=9).
- (H) Donor matched analysis of the MFI of TLR4 expression by CD3<sup>+</sup>CD4<sup>+</sup> T cells in peripheral blood (closed circles; PB) and in synovial fluid (open circles; SF) (n=9).
- (I) Correlation between the frequency of CD3<sup>+</sup>CD4<sup>+</sup> TLR4<sup>+</sup> T cells in blood (PB) and in synovial fluid (SF) (n=9).
- (J) t-SNE plots of peripheral blood total CD4<sup>+</sup> T cells. Color indicates cell expression levels of labelled marker (TLR4, HLA-DR and PD-1). Circle demarks TLR4<sup>+</sup> cells (n=26).
- (K-N) Confocal microscopy of FACS-purified HLA-DR<sup>-</sup> and HLA-DR<sup>+</sup> CD4<sup>+</sup> T cells. (K) Cells were surface labelled for CD3 and TLR4, stained for DAPI and analyzed by 3D confocal microscopy. Bar, 5µm. (L) Cumulative graphs of 3D volume (M) larger diameter and (N) roundness index.
- (O) t-SNE plots of peripheral blood total CD3<sup>+</sup>CD4<sup>+</sup> T cells. Color indicates cell expression levels of labelled marker (TLR4, Ki67 and CD38). Circle demarks TLR4<sup>+</sup> cells.
- (P, Q) Representative dot plots and cumulative graphs of the frequency (P) and  $\Delta$ MFI (Q) of Ki67 expression by TLR4<sup>-</sup> and TLR4<sup>+</sup> peripheral blood T cells (n=13 RA donors).
- (R, S) Representative dot plots and cumulative graphs of the frequency (R) and  $\Delta$ MFI (S) of CD38 expression by TLR4<sup>-</sup> and TLR4<sup>+</sup> peripheral blood T cells (n=13).
- $\Delta$ MFI was calculated to correct for the distinct autofluorescence of the TLR4<sup>-</sup> and TLR4<sup>+</sup> T cell populations.  $\Delta$ MFI was calculated by subtracting the fluorescence intensity minus one (FMO) from median fluorescence intensity (MFI) for each given marker.
- D'Agostino & Pearson normality test was performed. Shapiro-Wilk normality test was performed when n was too small for D'Agostino & Pearson normality testing. p values \*\*\*\*p<0.0001, \*\*\*p<0.001, \*\*p<0.01, \*p<0.05 were determined by (B, G, P) Paired t-test; (C, E, F, H, Q, R, S) Wilcoxon matched-pairs rank test; (I) Pearson Correlation and (L, M, N) Mann-Whitney test.

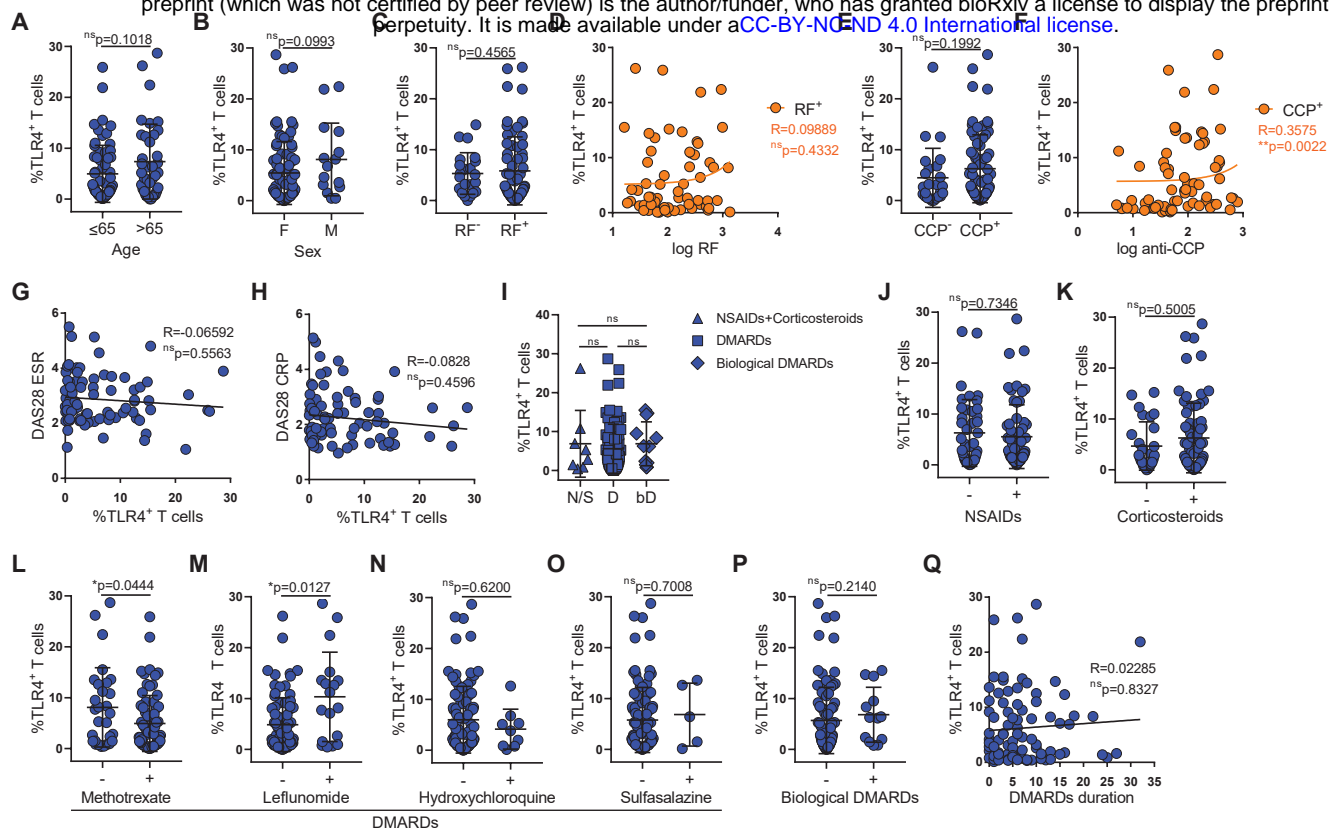

## 2. The frequency of TLR4<sup>+</sup> T correlates with anti-CCP antibody titers and age, independently of treatment.

(A) Frequency of TLR4<sup>+</sup> T cells disaggregated by age (n=101; ≤65 years n=64; >65 years n=37).

(B) Frequency of TLR4<sup>+</sup> T cells disaggregated by sex (n=101; female n=86; male n=15).

(C) Frequency of TLR4<sup>+</sup> T cells disaggregated by factor rheumatoid (RF) status (n=88; RF<sup>+</sup> n=66; RF<sup>-</sup> n=22).

(D) Correlation between factor rheumatoid titers and frequency of TLR4<sup>+</sup> T cells in rheumatoid factor positive patients (n=66).

(E) Frequency of TLR4<sup>+</sup> T cells disaggregated by factor anti-CCP antibody status (n=96; CCP<sup>+</sup> n=71; CCP<sup>-</sup> n=25).

(F) Correlation between factor anti-CCP antibody titers and frequency of TLR4<sup>+</sup> T cells in CCP positive patients (n=71).

(G) Correlation between frequency of TLR4<sup>+</sup> T cells and DAS28 ESR score (n=83).

(H) Correlation between frequency of TLR4<sup>+</sup> T cells and DAS28 CRP score (n=83).

(I) Frequency of TLR4<sup>+</sup> T cells disaggregated by treatment family (N/S- NSAID and/or corticoids n=8; D- DMARDs n=81; bD- biological DMARDs n=12).

(J-P) Frequency of TLR4<sup>+</sup> T cells segregated by medication usage (n=101). (J) NSAIDs, (K) Corticosteroids, (L) Methotrexate, (M) Leflunomide, (N) Hydroxychloroquine, (O) Sulfasalazine, (P) biological DMARDs.

(Q) Correlation between DMARD treatment duration and frequency of TLR4<sup>+</sup> T cells (n=88).

D'Agostino & Pearson normality test was performed.  $p$  values \*\*\*\* $p<0.0001$ , \*\*\* $p<0.001$ , \*\* $p<0.01$ , \* $p<0.05$  were determined by (A, B, C, E, J, K, L, M, N, O, P) Mann-Whitney test; (D, F, G, H) Spearman Correlation and (I) Krustall-Wallis test with posttest Dunn's multiple comparisons (N/S vs D and N/S vs bD  $^{ns}p>0.9999$  and D vs bD  $^{ns}p=0.6963$ ).



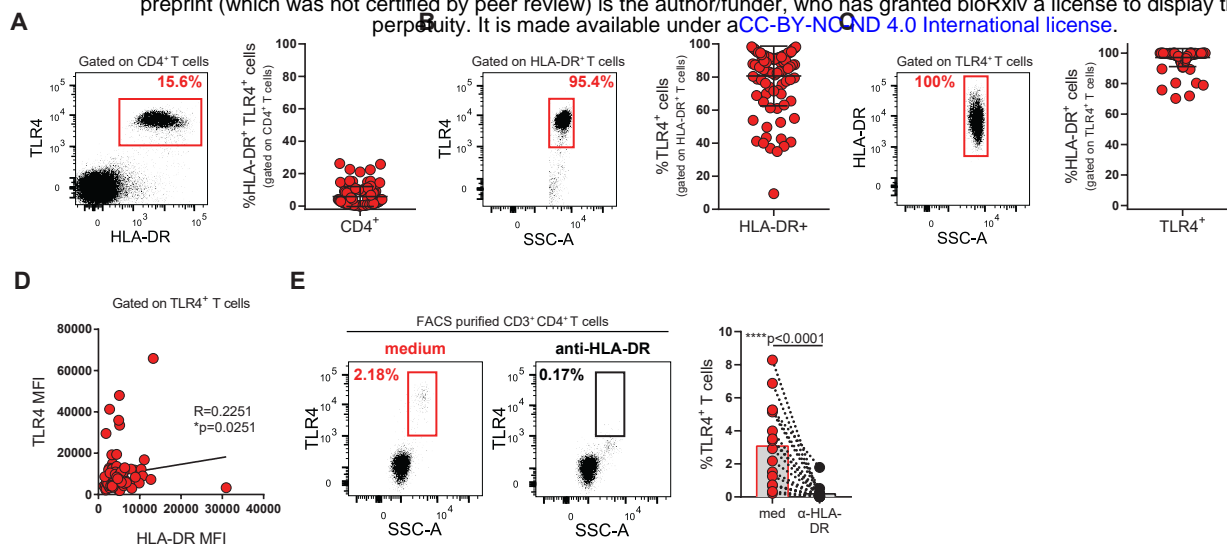

**Figure 3. Blocking HLA-DR abrogates TLR4 surface expression in T cells.**

(A) Representative plots and cumulative graph (n=99) of the frequency of HLA-DR<sup>+</sup>TLR4<sup>+</sup> T cells.

(B) Representative plots and cumulative graph (n=99) of the frequency of TLR4 expression by HLA-DR<sup>+</sup> T cells.

(C) Representative plots and cumulative graph (n=99) of the frequency of HLA-DR expression by TLR4<sup>+</sup> T cells.

(D) Correlation between HLA-DR and TLR4 MFIs in TLR4<sup>+</sup> T cells (n=99).

(E) Representative plots and cumulative graph (n=17) of the frequency of TLR4<sup>+</sup> T cells after incubating FACS-purified CD4<sup>+</sup> T cells with a blocking antibody to HLA-DR for 18 hours.

D'Agostino & Pearson normality test was performed. p values \*\*\*\*p<0.0001, \*\*\*p<0.001, \*\*p<0.01, \*p<0.05 were determined by (D) Spearman Correlation and (E) Wilcoxon matched-pairs rank test.

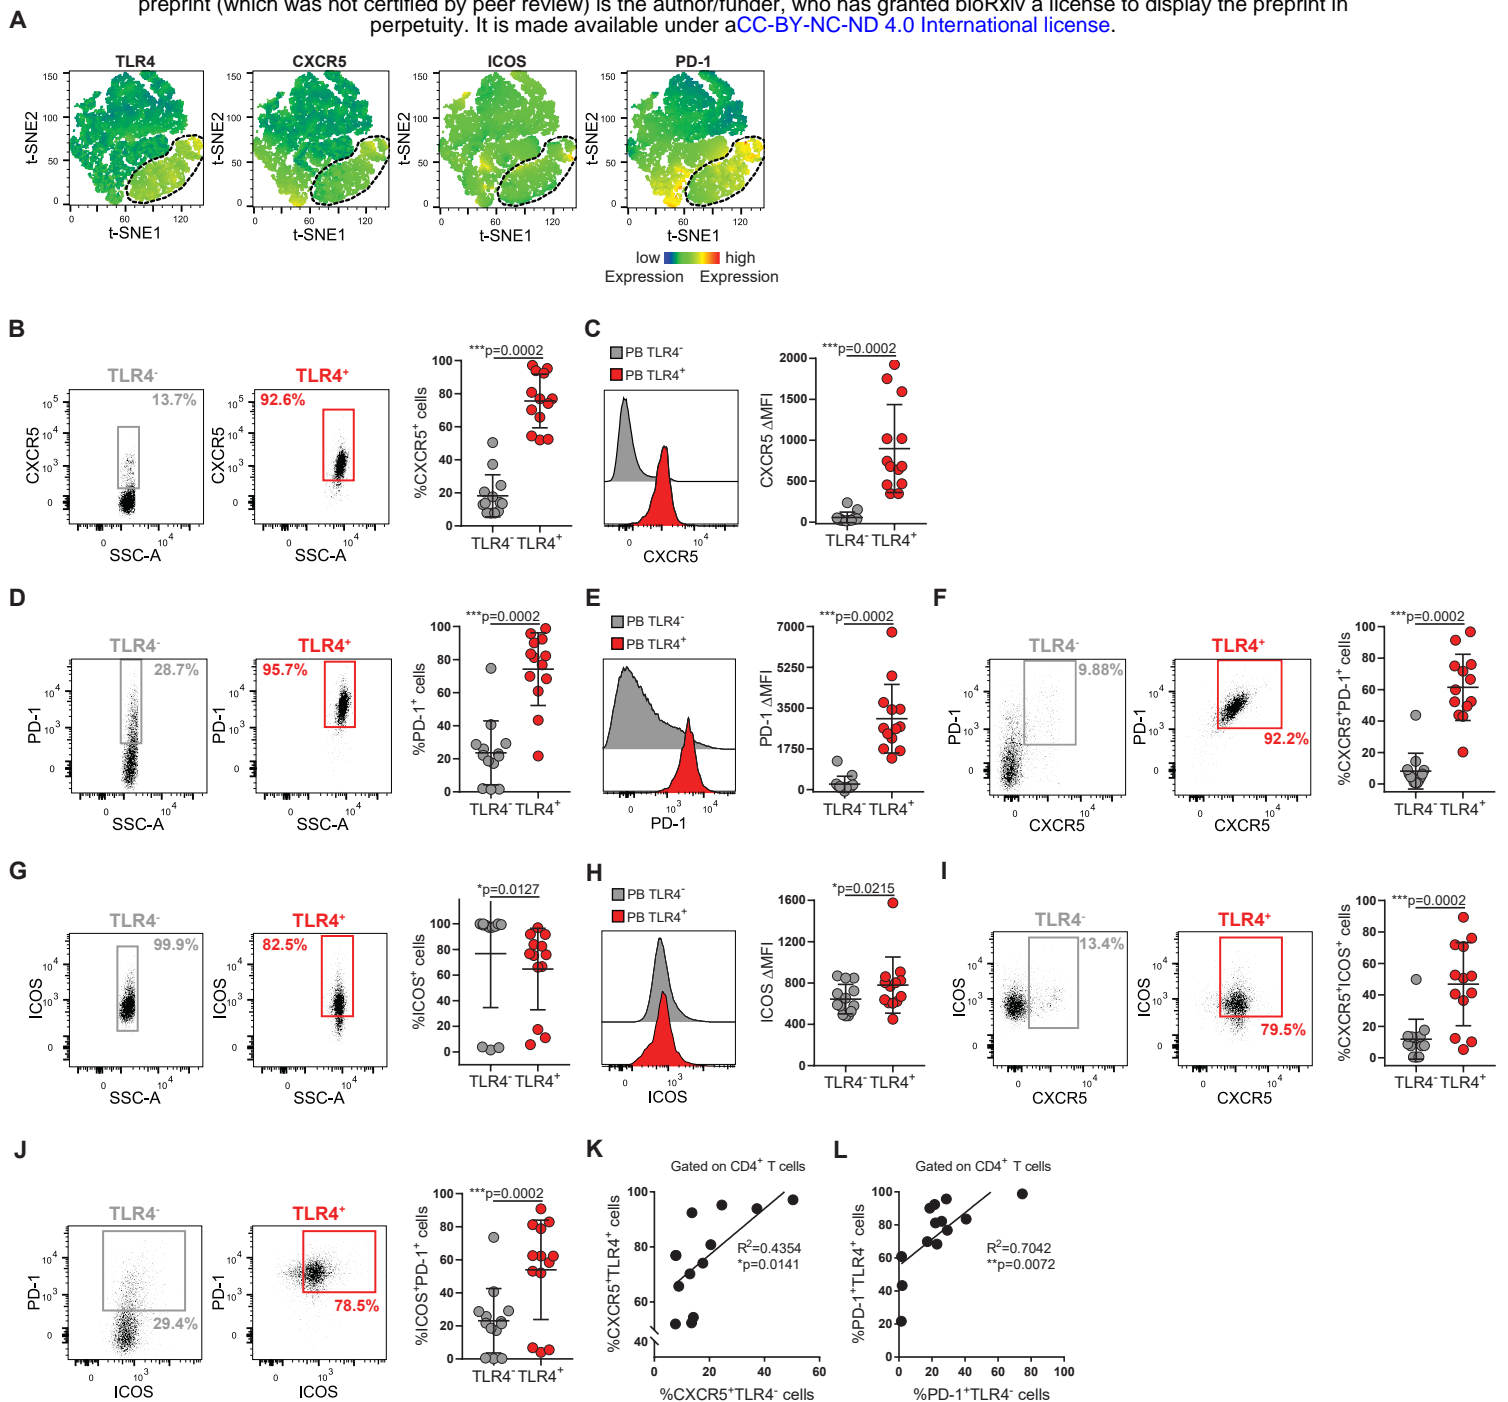

**Figure 4. TLR4<sup>+</sup> T cells have features of Tfh-like cells.**

(A) t-SNE plots of peripheral blood total CD4<sup>+</sup> T cells. Color indicates cell expression levels of labelled marker (TLR4, CXCR5, ICOS and PD-1). Circle demarks TLR4<sup>+</sup> cells.

(B, C) Representative plots and cumulative analysis (n=13) of CXCR5 frequency (A) and ΔMFI (B) in TLR4<sup>+</sup> (red) versus TLR4<sup>-</sup> (grey) T cells.

(D, E) Representative plots and cumulative analysis (n=13) of PD-1 frequency (D) and ΔMFI (E) in TLR4<sup>+</sup> (red) versus TLR4<sup>-</sup> T cells (grey).

(F) Representative plots and cumulative analysis (n=13) of the frequency of CXCR5 and PD-1 co-expression TLR4<sup>+</sup> (red) versus TLR4<sup>-</sup> (grey) T cells.

(G, H) Representative plots and cumulative analysis (n=13) of ICOS frequency (G) and ΔMFI (H) in TLR4<sup>+</sup> (red) versus TLR4<sup>-</sup> (grey) T cells.

(I) Representative plots and cumulative analysis (n=13) of the frequency of CXCR5 and ICOS co-expression in TLR4<sup>+</sup> (red) versus TLR4<sup>-</sup> (grey) T cells.

(J) Representative plots and cumulative analysis (n=13) of the frequency of ICOS and PD-1 co-expression TLR4<sup>+</sup> (red) versus TLR4<sup>-</sup> (grey) T cells.

(K) Correlation between the frequency of TLR4<sup>+</sup>CXCR5<sup>+</sup> T cells and TLR4<sup>-</sup>CXCR5<sup>+</sup> cells (n=13).

(L) Correlation between the frequency of TLR4<sup>+</sup>PD-1<sup>+</sup> T cells and TLR4<sup>-</sup>PD-1<sup>+</sup> cells (n=13).

ΔMFI was calculated to correct for the distinct autofluorescence of the TLR4<sup>-</sup> and TLR4<sup>+</sup> T cell populations. ΔMFI was calculated by subtracting the fluorescence intensity minus one (FMO) from median fluorescence intensity (MFI) for each given marker.

D'Agostino & Pearson normality test was performed. p values \*\*\*\*p<0.0001, \*\*\*p<0.001, \*\*p<0.01, \*p<0.05 were determined by (B, C, D, E, F, H, I, J) Wilcoxon matched-pairs rank test; (G) Paired t-test; (K, L) Pearson Correlation.

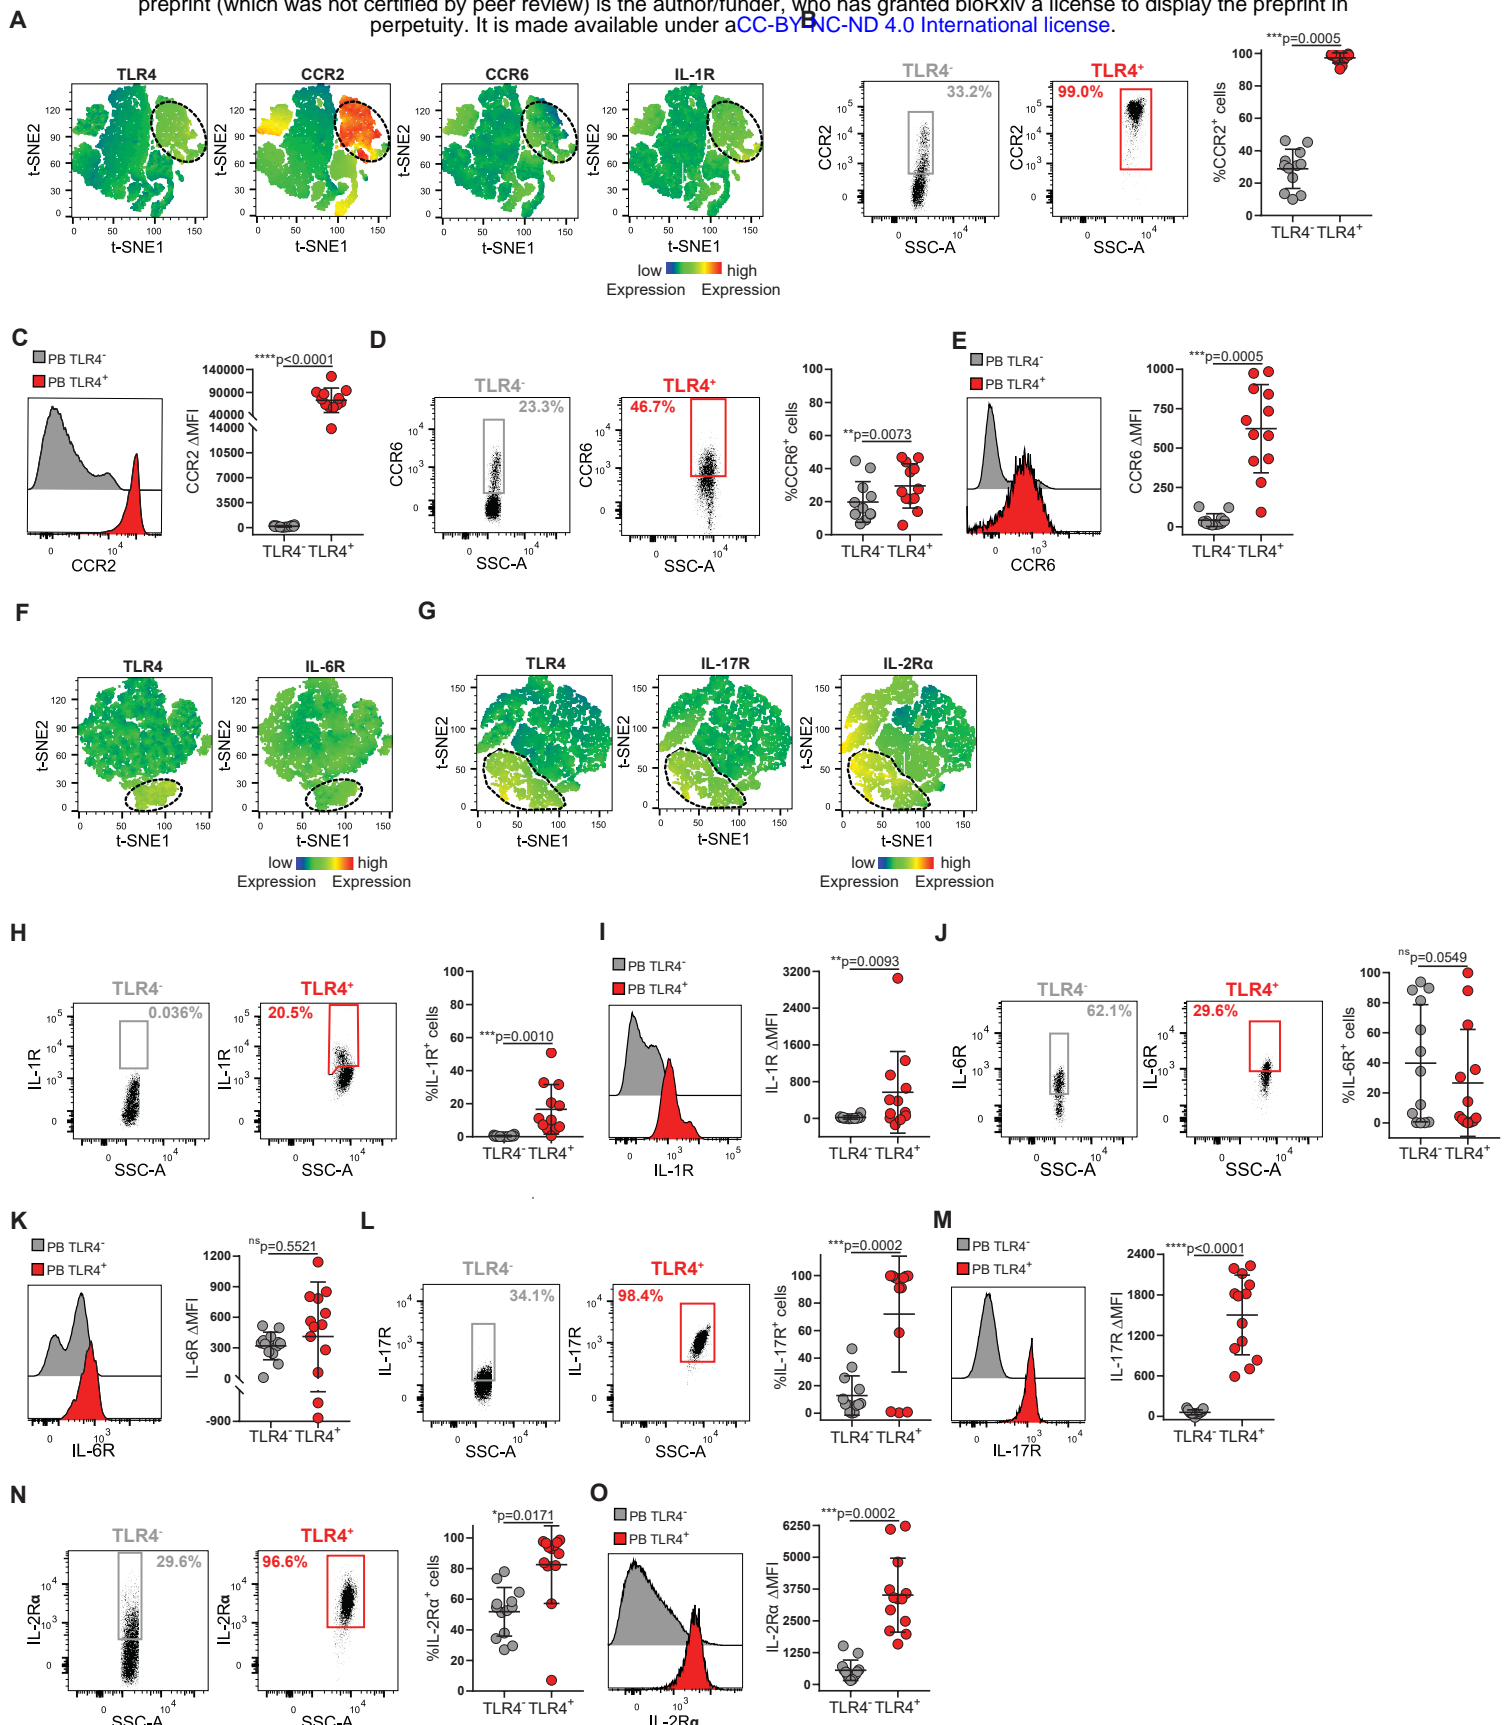

**Figure 5. TLR4<sup>+</sup> T cells display inflammatory chemokine and cytokine receptors.**

(A) t-SNE plots of peripheral blood total CD4<sup>+</sup> T cells. Color indicates cell expression levels of labelled marker (TLR4, CCR2, CCR6, IL-1R). Circle demarks TLR4<sup>+</sup> cells.

(B, C) Representative plots and cumulative graph (n=12) of CCR2 frequency (B) and ΔMFI (C) in TLR4<sup>+</sup> (red) and TLR4<sup>-</sup> (grey) T cells.

(D, E) Representative plots and cumulative graph (n=12) of CCR6 frequency (D) and ΔMFI (E) in TLR4<sup>+</sup> (red) and TLR4<sup>-</sup> (grey) T cells.

(F-G) t-SNE plots of peripheral blood total CD4<sup>+</sup> T cells. Color indicates cell expression levels of labelled marker. (F) TLR4, IL-6R. (G) TLR4, IL-17R and IL-2Rα. Circle demarks TLR4<sup>+</sup> cells.

(H, I) Representative plots and cumulative graph (n=12) of IL-1R frequency (H) and ΔMFI (I) in TLR4<sup>+</sup> (red) and TLR4<sup>-</sup> (grey) T cells.

(J, K) Representative plots and cumulative graph (n=13) of IL-6R frequency (J) and ΔMFI (K) in TLR4<sup>+</sup> (red) and TLR4<sup>-</sup> (grey) T cells.

(L, M) Representative plots and cumulative graph (n=13) of IL-17R frequency (L) and ΔMFI (M) in TLR4<sup>+</sup> (red) and TLR4<sup>-</sup> (grey) T cells.

(N, O) Representative plots and cumulative graph (n=13) of IL-2Rα frequency (L) and ΔMFI (M) in TLR4<sup>+</sup> (red) and TLR4<sup>-</sup> (grey) T cells.

ΔMFI was calculated to correct for the distinct autofluorescence of the TLR4<sup>-</sup> and TLR4<sup>+</sup> T cell populations. ΔMFI was calculated by subtracting the fluorescence intensity minus one (FMO) from median fluorescence intensity (MFI) for each given marker.

D'Agostino & Pearson normality test was performed. p values \*\*\*\*p<0.0001, \*\*\*p<0.001, \*\*p<0.01, \*p<0.05 were determined by (B, E, H, I, J, L, N, O) Wilcoxon matched-pairs rank test; (C, D, K, M) Paired t-test.

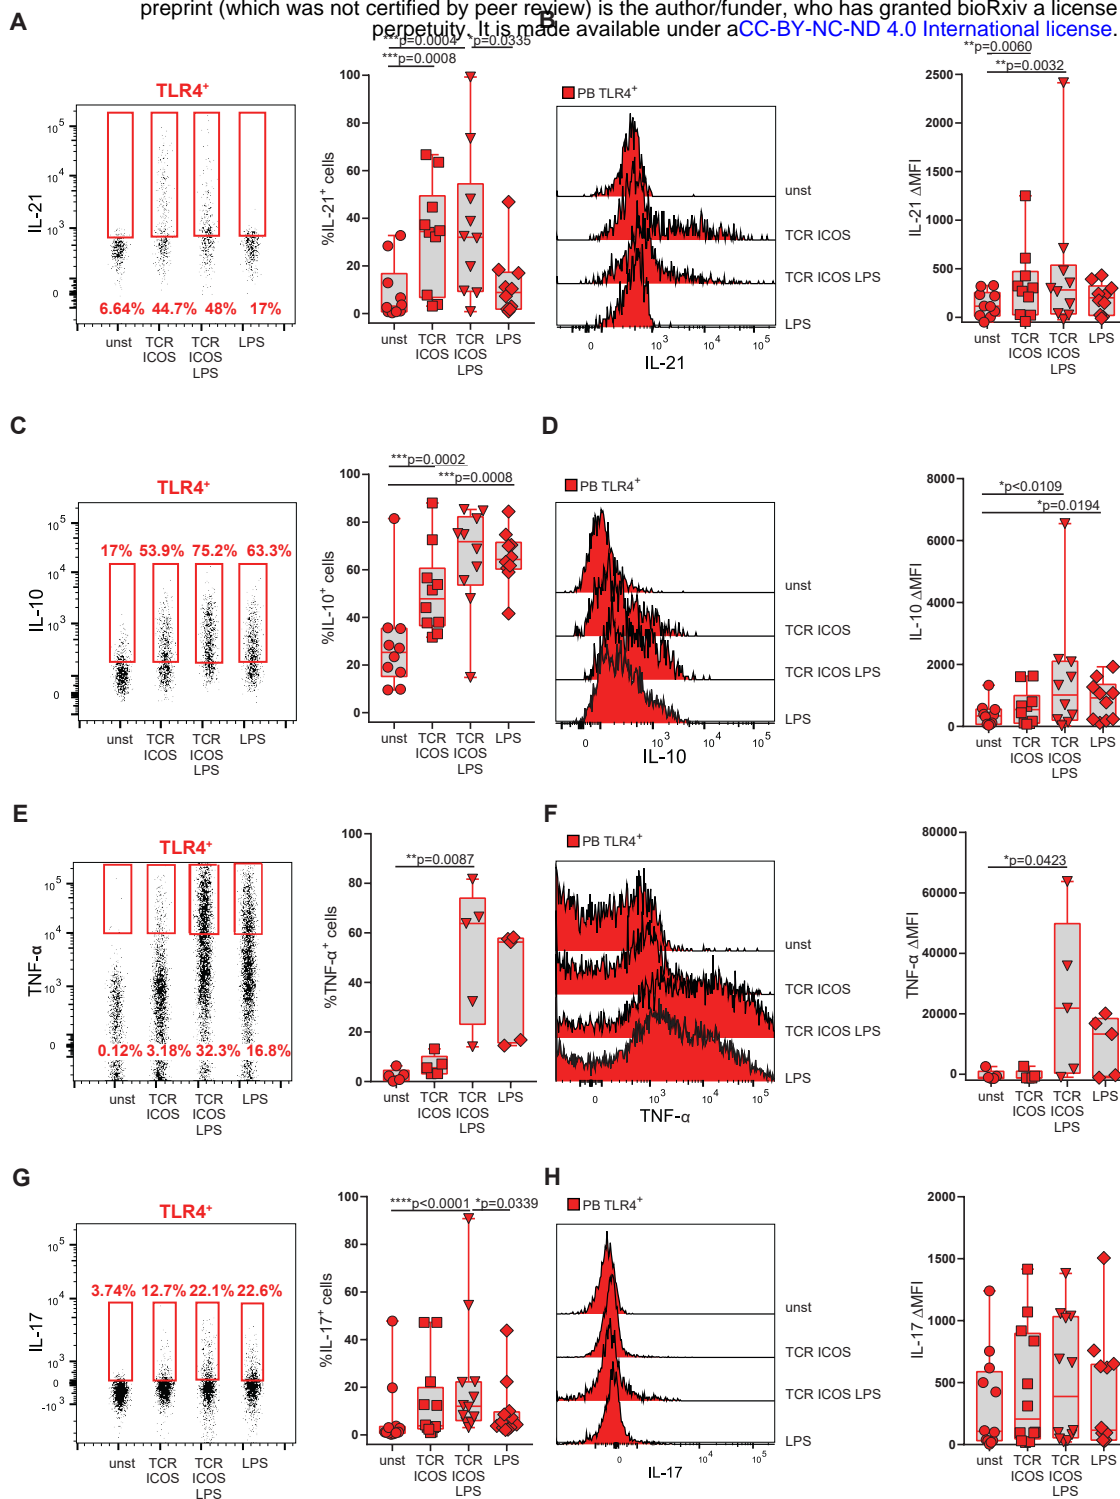

**Figure 6. Direct recognition of LPS by TLR4<sup>+</sup> T cells reprograms their cytokine program.**

FACS-purified CD3<sup>high</sup>CD4<sup>high</sup> T cells from freshly obtained peripheral blood were cultured for 18 hours and stimulated with either α-CD3 and α-ICOS (TCR ICOS); α-CD3, α-ICOS and LPS (TCR ICOS LPS); LPS alone; or left unstimulated (unst).

(A, B) Frequency (A) and ΔMFI (B) of IL-21 production by TLR4<sup>+</sup> T cells (n=11).

(C, D) Frequency (C) and ΔMFI (D) of IL-10 production by TLR4<sup>+</sup> T cells (n=11).

(E, F) Frequency (E) and ΔMFI (F) of TNF-α production by TLR4<sup>+</sup> T cells (n=5).

(G, H) Frequency (G) and ΔMFI (H) of IL-17 production by TLR4<sup>+</sup> T cells (n=12).

ΔMFI was calculated by subtracting the fluorescence intensity minus one (FMO) from median fluorescence intensity (MFI) for each given marker. D'Agostino & Pearson normality test was performed. p values \*\*\*\*p<0.0001, \*\*\*p<0.001, \*\*p<0.01, \*p<0.05 were determined by (A, B, C, D, E, F, G) Friedman test with posttest Dunn's multiple comparisons; (H) RM one-way ANOVA with posttest Tukey's multiple comparisons.

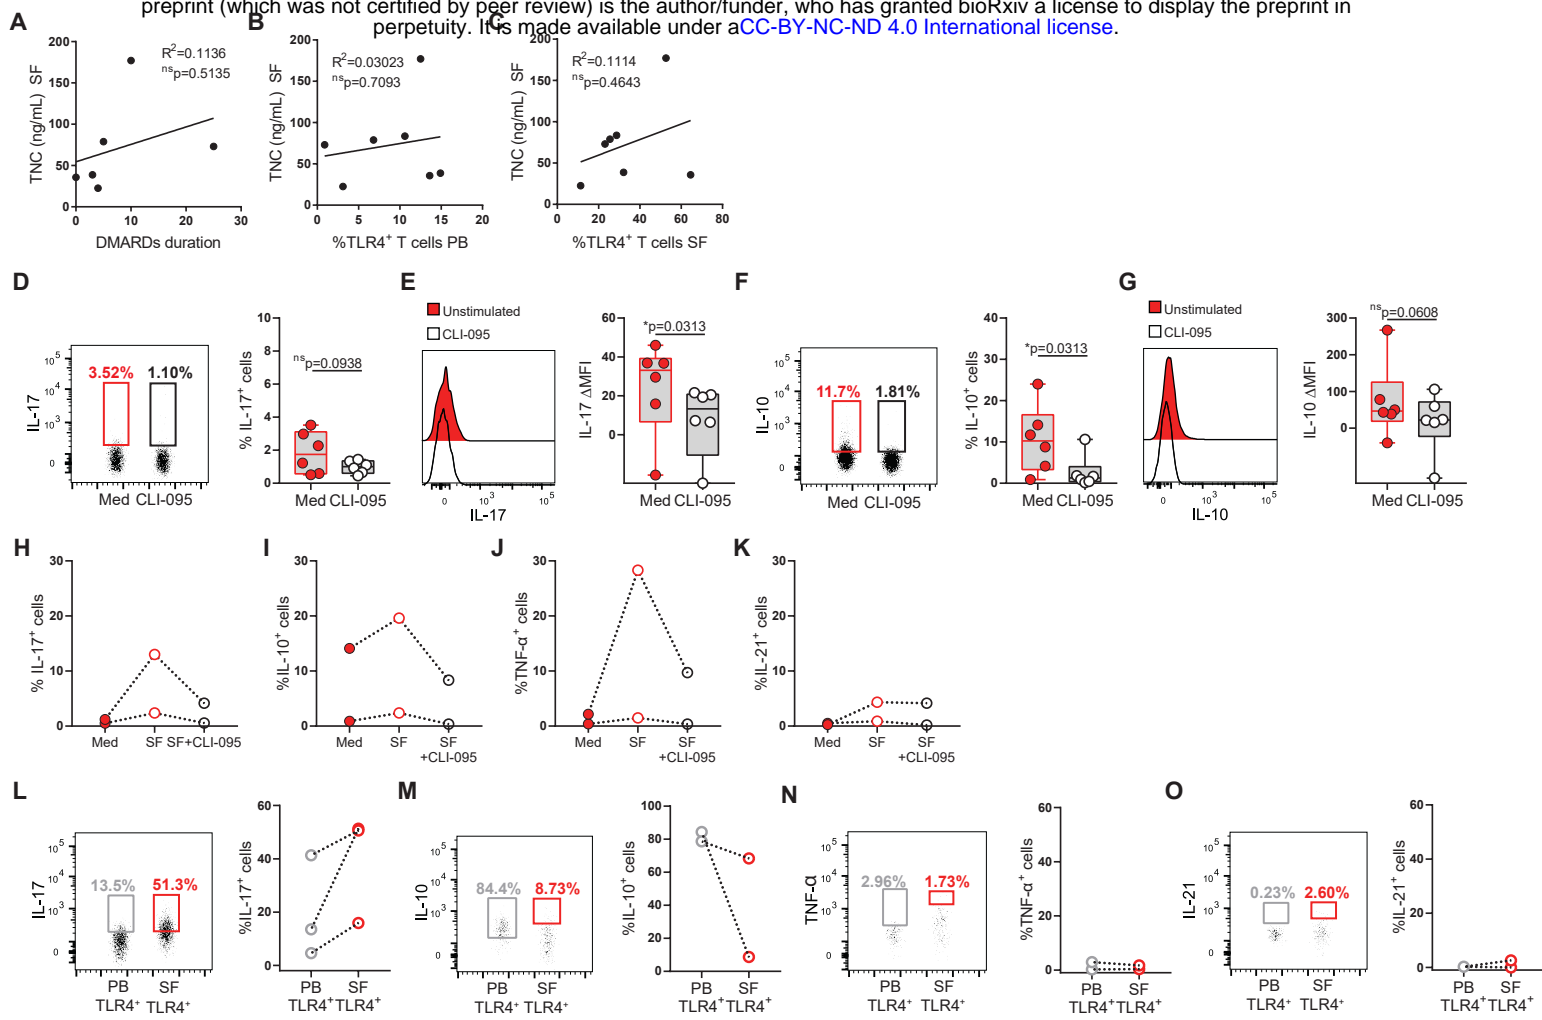

**Figure 7. Direct recognition of TLR4 ligands present in synovial fluid drives IL-17 production, independently of antigen recognition.**

(A-C) Correlation between synovial fluid tenascin-C levels and DMARD duration (A, n=5), frequency of circulating (PB) TLR4<sup>+</sup> T cells (B, n=7), and frequency of synovial fluid (SF) TLR4<sup>+</sup> T cells (G, n=7).

(D-G) FACS-purified CD3<sup>high</sup>CD4<sup>high</sup> T cells from peripheral blood were cultured for 18 hours in the presence of medium (Med) or TLR4 signaling inhibitor (CLI-095). Frequency and ΔMFI of IL-17 (D, E) and IL-10 (F, G) production by TLR4<sup>+</sup> T cells (n=6).

(H-K) FACS-purified CD3<sup>high</sup>CD4<sup>high</sup> T cells from peripheral blood were cultured for 18 hours in the presence of medium (Med), synovial fluid (SF) or TLR4 signaling inhibitor (CLI-095). Frequency IL-17 (H), IL-10 (I), TNF-α (J) and IL-21 (K) production by TLR4<sup>+</sup> T cells (n=2).

(L-O) Ex vivo production of IL-17, IL-10, TNF-α and IL-21 by TLR4<sup>+</sup> T cells in n=3 freshly obtained peripheral blood (PB) and synovial fluid (SF) donor paired samples.

ΔMFI was calculated by subtracting the fluorescence intensity minus one (FMO) from median fluorescence intensity (MFI) for each given marker. FMOs were calculated independently for blood and synovial fluid FACS analysis.

Shapiro-Wilk normality test was performed because the n was too small for D'Agostino & Pearson normality testing. p values \*\*\*\*p<0.0001, \*\*\*p<0.001, \*\*p<0.01, \*p<0.05 were determined by (A, B, C) Pearson Correlation; (D, E, F) Wilcoxon matched-pairs rank test and (G) Paired t-test.

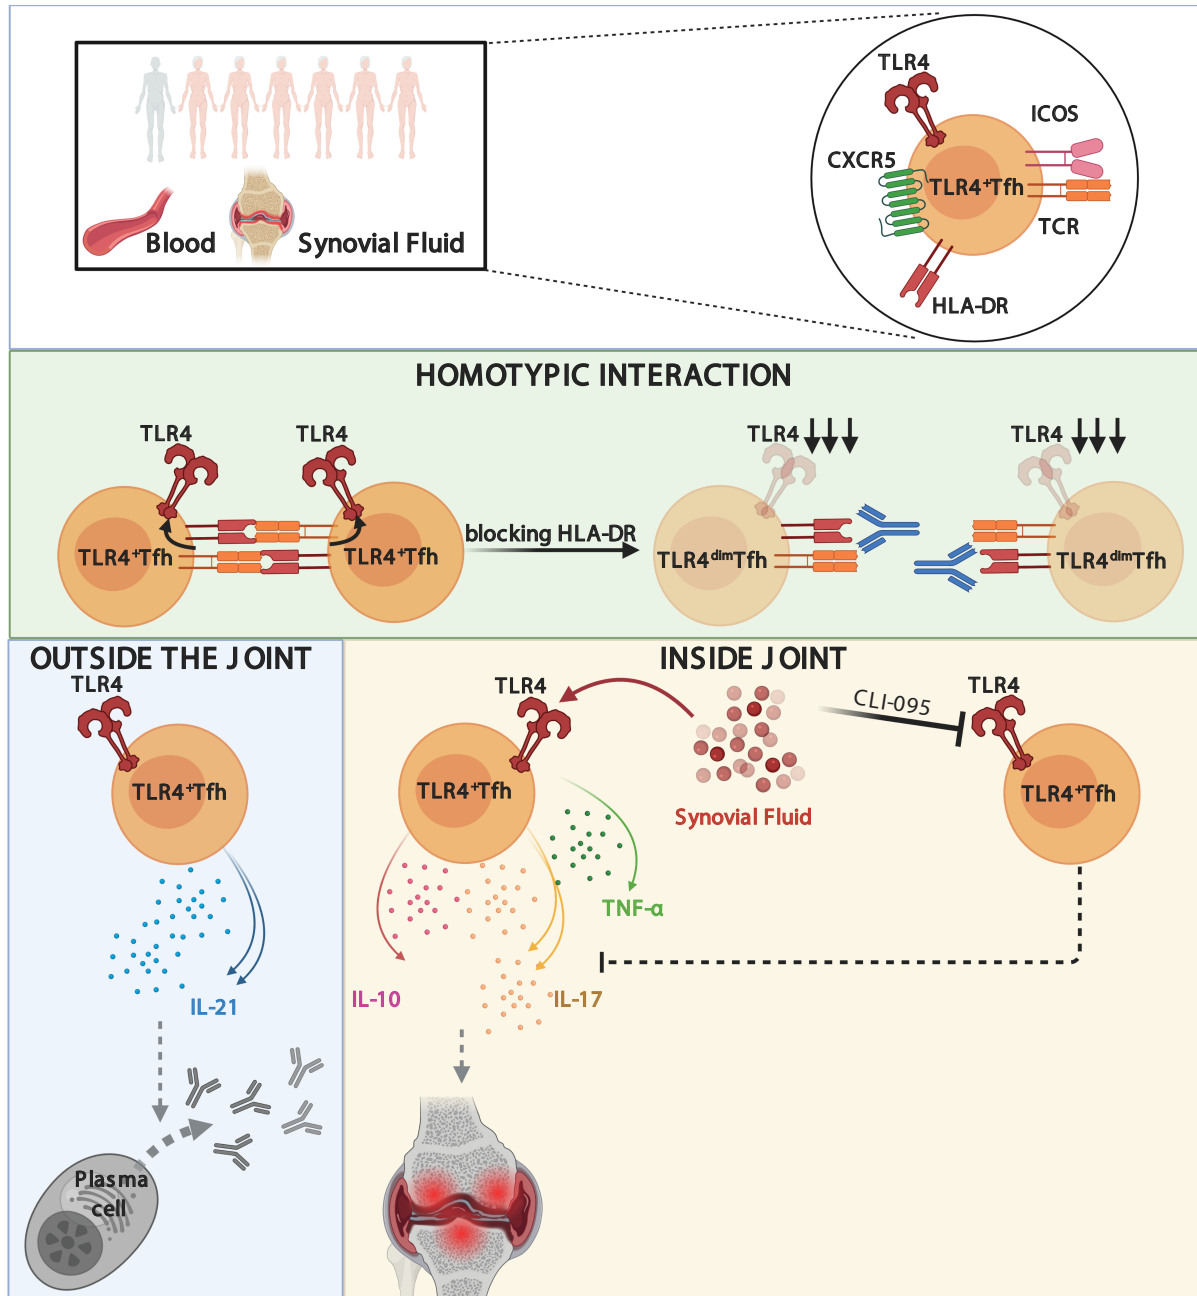

**Figure 8. Schematic representation of proposed mechanism and role of TLR4<sup>+</sup> T cells in RA.**

From top to bottom: a population of TLR4<sup>+</sup> Tfh-like T cells expanded in synovial fluid of RA patients was characterized in a cohort of more than 100 RA patients. We uncovered a function for HLA-DR expression by T cells, as homotypic T:T cell contacts established through HLA-DR:TCR were found to be required for TLR4 expression by T cells. TLR4<sup>+</sup> T cells display a two-pronged mechanism uniquely poised to tailor their pathogenic phenotype in response to contextual cues. Outside the joints, TCR driven IL-21 production favors antibody production, which likely contributes to anti-CCP antibody titers. Within in the affected joints direct sensing of joint damage patterns by TLR4<sup>+</sup> T cells reprograms them towards an IL-17 pathological program known to drive and sustain cartilage damage and bone erosions.

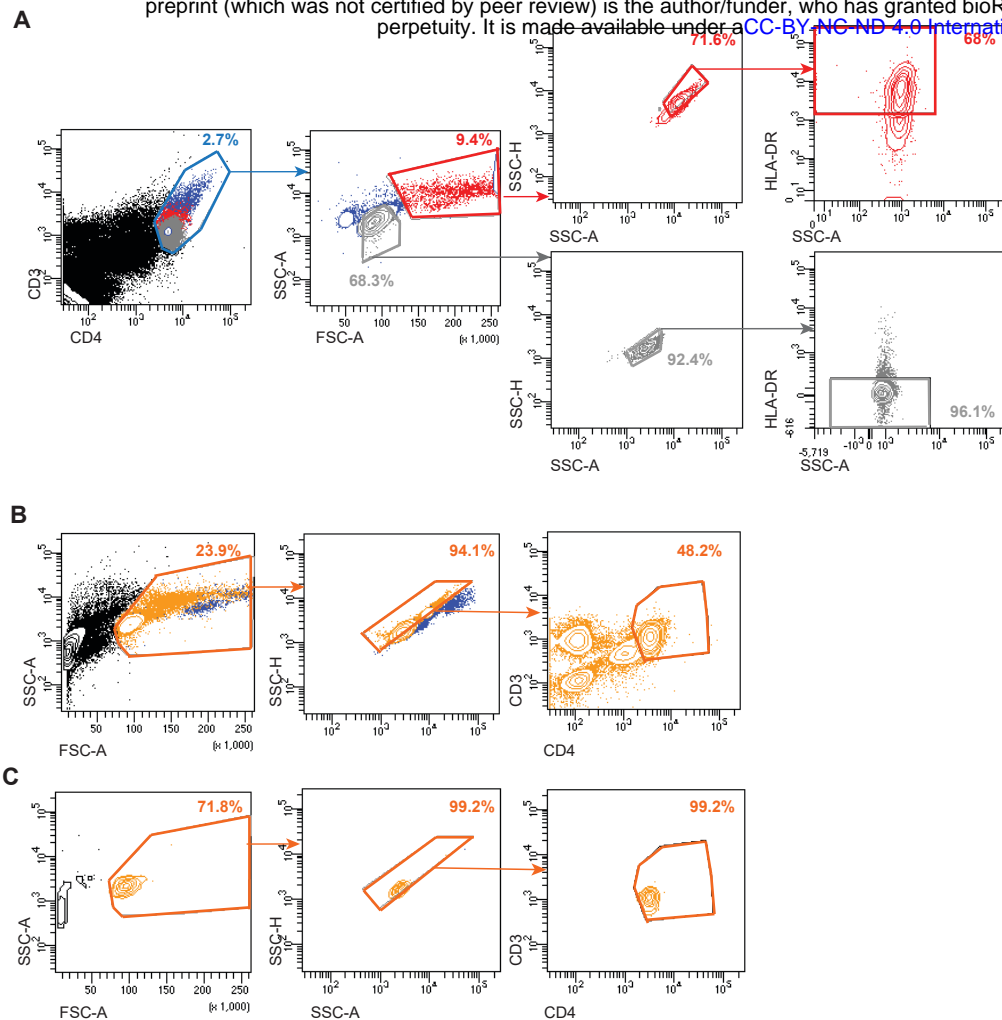

**Table 1. Donors**

| Subject ID | Age | Gender | Blood Phenotyping | Synovial Fluid Phenotyping | Receptors | Cytokines | Anti-CCP ELISA | Confocal Microscopy |
|------------|-----|--------|-------------------|----------------------------|-----------|-----------|----------------|---------------------|
| HEM_RA_016 | 49  | F      | +                 |                            |           |           | +              |                     |
| HEM_RA_032 | 38  | F      | +                 |                            |           |           | +              |                     |
| HEM_RA_011 | 71  | F      | +                 |                            |           |           | +              |                     |
| HEM_RA_036 | 48  | F      | +                 |                            |           |           | +              |                     |
| HEM_RA_037 | 59  | F      | +                 |                            |           |           | +              |                     |
| HEM_RA_038 | 57  | F      | +                 |                            |           |           | +              |                     |
| HEM_RA_023 | 40  | F      | +                 |                            |           |           | +              |                     |
| HEM_RA_030 | 54  | M      | +                 |                            |           |           | +              |                     |
| HEM_RA_007 | 76  | F      | +                 |                            |           |           | +              |                     |
| HEM_RA_001 | 60  | F      | +                 |                            |           |           | +              |                     |
| HEM_RA_039 | 54  | F      | +                 |                            |           |           | +              |                     |
| HEM_RA_063 | 66  | F      | +                 |                            |           |           | +              |                     |
| HEM_RA_064 | 55  | M      | +                 |                            |           |           | +              |                     |
| HEM_RA_065 | 59  | F      | +                 |                            |           |           | +              |                     |
| HEM_RA_066 | 68  | M      | +                 |                            |           |           | +              |                     |
| HEM_RA_067 | 70  | F      | +                 |                            |           |           | +              |                     |
| HEM_RA_051 | 61  | F      | +                 | +                          |           |           | +              |                     |
| HEM_RA_068 | 65  | M      | +                 | +                          |           |           | +              |                     |
| HEM_RA_069 | 61  | M      | +                 | +                          |           |           | +              |                     |
| HEM_RA_070 | 72  | F      | +                 | +                          |           |           | +              |                     |
| HEM_RA_071 | 58  | F      | +                 |                            |           |           | +              |                     |
| HEM_RA_072 | 61  | F      | +                 |                            |           |           | +              |                     |
| HEM_RA_073 | 73  | F      | +                 |                            |           |           | +              |                     |
| HEM_RA_074 | 82  | F      | +                 |                            |           |           | +              |                     |
| HEM_RA_075 | 41  | F      | +                 |                            |           |           | +              |                     |
| HEM_RA_076 | 62  | F      | +                 |                            |           |           | +              |                     |
| HEM_RA_078 | 70  | F      | +                 |                            |           |           | +              |                     |
| HEM_RA_079 | 73  | F      | +                 |                            |           |           | +              |                     |
| HEM_RA_080 | 79  | F      | +                 |                            |           |           | +              |                     |
| HEM_RA_081 | 71  | F      | +                 |                            |           |           | +              |                     |
| HEM_RA_082 | 43  | F      | +                 |                            |           |           | +              |                     |
| HEM_RA_083 | 50  | F      | +                 |                            |           |           | +              |                     |



|            |    |   |   |   |  |   |   |  |
|------------|----|---|---|---|--|---|---|--|
| HEM_RA_084 | 78 | F | + |   |  |   | + |  |
| HEM_RA_085 | 61 | F | + |   |  |   | + |  |
| HEM_RA_086 | 51 | F | + |   |  |   | + |  |
| HEM_RA_087 | 85 | F | + |   |  |   | + |  |
| HEM_RA_088 | 65 | F | + |   |  |   | + |  |
| HEM_RA_089 | 60 | F | + |   |  |   | + |  |
| HEM_RA_090 | 52 | F | + |   |  |   | + |  |
| HEM_RA_091 | 80 | F | + |   |  |   | + |  |
| HEM_RA_092 | 78 | F | + |   |  |   | + |  |
| HEM_RA_093 | 60 | F | + | + |  |   | + |  |
| HEM_RA_094 | 72 | F | + |   |  |   | + |  |
| HEM_RA_095 | 49 | F | + |   |  |   | + |  |
| HEM_RA_096 | 55 | F | + |   |  |   | + |  |
| HEM_RA_097 | 68 | F | + |   |  | + | + |  |
| HEM_RA_098 | 80 | F | + |   |  | + | + |  |
| HEM_RA_099 | 46 | M | + |   |  | + | + |  |
| HEM_RA_100 | 85 | F | + |   |  |   | + |  |
| HEM_RA_101 | 63 | F | + |   |  |   | + |  |
| HEM_RA_102 | 50 | F | + |   |  | + | + |  |
| HEM_RA_103 | 42 | F | + |   |  | + | + |  |
| HEM_RA_104 | 62 | F | + |   |  | + | + |  |
| HEM_RA_105 | 57 | F | + |   |  | + | + |  |
| HEM_RA_106 | 82 | F | + |   |  |   | + |  |
| HEM_RA_107 | 72 | F | + |   |  |   | + |  |
| HEM_RA_108 | 60 | F | + |   |  |   | + |  |
| HEM_RA_109 | 52 | F | + |   |  |   | + |  |
| HEM_RA_110 | 68 | F | + |   |  | + | + |  |
| HEM_RA_111 | 61 | F | + |   |  | + | + |  |
| HEM_RA_112 | 85 | F | + |   |  | + | + |  |
| HEM_RA_113 | 71 | F | + |   |  | + | + |  |
| HEM_RA_114 | 56 | F | + |   |  |   | + |  |
| HEM_RA_115 | 60 | F | + |   |  |   | + |  |
| HEM_RA_116 | 42 | M | + |   |  |   | + |  |
| HEM_RA_117 | 56 | M | + |   |  |   | + |  |
| HEM_RA_118 | 53 | F | + |   |  | + | + |  |

|            |    |   |   |   |   |   |                                  |   |
|------------|----|---|---|---|---|---|----------------------------------|---|
| HEM_RA_119 | 45 | F | + |   |   | + | +                                |   |
| HEM_RA_120 | 62 | F | + |   |   | + | +                                |   |
| HEM_RA_123 | 31 | F | + |   |   |   | +                                |   |
| HEM_RA_124 | 78 | F | + |   |   | + | +                                |   |
| HEM_RA_125 | 55 | F | + |   |   | + | +                                |   |
| HEM_RA_126 | 67 | F | + |   |   | + | +                                |   |
| HEM_RA_127 | 63 | F | + |   |   |   | +                                | + |
| HEM_RA_128 | 60 | F | + |   | + |   | +                                |   |
| HEM_RA_129 | 76 | M | + |   | + | + | +                                |   |
| HEM_RA_130 | 42 | M | + |   |   | + | +                                |   |
| HEM_RA_131 | 78 | M | + |   | + |   | +                                |   |
| HEM_RA_132 | 64 | M | + |   | + |   | +                                |   |
| HEM_RA_133 | 47 | F | + |   | + |   | +                                |   |
| HEM_RA_134 | 57 | F | + | + |   |   | +                                |   |
| HEM_RA_135 | 77 | F | + |   |   | + | +                                |   |
| HEM_RA_136 | 76 | F | + |   |   | + | +                                |   |
| HEM_RA_137 | 64 | F | + |   | + |   | +                                |   |
| HEM_RA_138 | 66 | F | + |   | + |   | +                                |   |
| HEM_RA_139 | 40 | M | + |   |   | + | +                                |   |
| HEM_RA_140 | 56 | M | + |   | + |   | +                                |   |
| HEM_RA_141 | 54 | F | + |   | + | + | +                                |   |
| HEM_RA_142 | 48 | F | + |   | + |   | +                                |   |
| HEM_RA_143 | 48 | F | + |   |   | + | +                                |   |
| HEM_RA_144 | 59 | F | + |   |   | + | +                                |   |
| HEM_RA_145 | 72 | F | + |   | + | + | +                                |   |
| HEM_RA_146 | 69 | F | + |   | + |   | +                                |   |
| HEM_RA_147 | 65 | F | + |   | + |   | +                                |   |
| HEM_RA_148 | 74 | F | + |   |   | + | +                                |   |
| HEM_RA_149 | 37 | F | + |   |   | + | +                                |   |
| HEM_RA_150 | 36 | F | + | + |   |   | +                                |   |
| HEM_RA_151 | 40 | F | + |   |   | + | CCP status from clinical records |   |
| HEM_RA_152 | 72 | F | + |   |   | + | CCP status from clinical records |   |
| HEM_RA_153 | 64 | F | + |   |   | + | CCP status from clinical records |   |

|            |    |   |   |   |  |   |                                  |  |
|------------|----|---|---|---|--|---|----------------------------------|--|
| HEM_RA_154 | 68 | F | + |   |  | + | CCP status from clinical records |  |
| HEM_RA_155 | 52 | M | + | + |  | + | CCP status from clinical records |  |
| HEM_RA_156 |    |   | + | + |  | + | CCP status from clinical records |  |

**Table 2. Reagents**

| Reagent or Resource        | Source                   | Identifier               |
|----------------------------|--------------------------|--------------------------|
| <b>Antibodies</b>          |                          |                          |
| Anti-mouse IgG1            | BioLegend                | Cat#406602               |
| Anti-hamster IgG           | Thermo Fisher Scientific | Cat#31115                |
| Anti-CD3 (UCHT1)           | BioLegend                | Cat#300402               |
| Anti-HLA-DR (L243)         | BioLegend                | Cat#307602               |
| Anti-ICOS (C398-4A)        | BioLegend                | Cat#313512               |
| Anti-TLR4 (HTA125)         | BioLegend                | Cat#312804               |
| Anti-TLR4 (76B357.1)       | Abcam                    | Cat#ab22048              |
| Anti-IL1R (C-20)           | Santa Cruz               | Cat#sc-687               |
| Anti-CD4 (RPA-T4)          | BioLegend                | Cat#300506 (FITC)        |
| Anti-HLA-DR (L243)         | BioLegend                | Cat#307606 (PE)          |
| Anti-TLR4 (HTA125)         | BioLegend                | Cat#312805 (PE)          |
| Streptavidin               | Biolegend                | Cat#405205 (PeCy5)       |
| Anti-TNF- $\alpha$ (MAb11) | Biolegend                | Cat#502926 (PerCP/Cy5.5) |
| Anti-PD1 (EH12.2H7)        | BioLegend                | Cat#329917 (PeCy7)       |
| Anti-CCR2 (K036C2)         | BioLegend                | Cat#357211 (PeCy7)       |
| Anti-CD25 (M-A251)         | BioLegend                | Cat#356107 (PeCy7)       |
| Anti-Ki67 (B56)            | BD Pharmigen             | Cat#561283 (PeCy7)       |
| Anti-TNF $\alpha$ (MAb11)  | BioLegend                | Cat#502929 (PeCy7)       |
| Anti-IL-10 (JES3-9D7)      | BioLegend                | Cat#501419 (PE-Cy7)      |
| Anti-CD4 (RPA-T4)          | BioLegend                | Cat#300514 (APC)         |
| Anti-IL6R (UV4)            | BioLegend                | Cat#352805 (APC)         |
| Anti-ICOS (C398.4A)        | BioLegend                | Cat#313510 (APC)         |
| Anti-IL17R (BG/hIL17AR)    | BioLegend                | Cat#340903 (A647)        |
| Anti-IL-21 (3A3-N2)        | BioLegend                | Cat#513006 (A647)        |
| Anti-rabbit                | Invitrogen               | Cat#A-21244 (A647)       |
| Anti-mouse IgG1            | Thermo Fisher            | Cat#A21240 (A647)        |
| Anti-CD3 (HIT3a)           | BioLegend                | Cat#300318 (APC-Cy7)     |
| Anti-CCR6 (G034E3)         | BioLegend                | Cat#353432 (APC-Cy7)     |
| Anti-CD38 (HIT2)           | BioLegend                | Cat#303533 (APC-Cy7)     |
| Anti-CXCR5 (J252D4)        | BioLegend                | Cat#356925 (APC-Cy7)     |
| Anti-IL17 (BL168)          | Biolegend                | Cat#512320 (APC-Cy7)     |
| Anti-CD3 (SK7)             | BioLegend                | Cat#344828 (Bv510)       |
| Anti-CD3 (SK7)             | BioLegend                | Cat#3448284 (PB)         |
| Anti-mouse IgG2b           | Thermo Fisher            | Cat#A21141 (A488)        |

## Dyes

|                                   |             |                |
|-----------------------------------|-------------|----------------|
| Calcein Violet-AM                 | BioLegend   | Cat#425203     |
| Fixable Viability Dye eFluor™ 506 | eBioscience | Cat#65-0866-14 |
| Fixable Viability Dye eFluor™ 780 | eBioscience | Cat#65-0865-14 |

## Chemicals

|                                                                     |                                                                                      |                 |
|---------------------------------------------------------------------|--------------------------------------------------------------------------------------|-----------------|
| Phosphate-buffered saline (PBS)<br>10x, Sterile Ultra-Pure Grade    | VWR                                                                                  | Cat#97063-660   |
| Phosphate-buffered saline (PBS)<br>10x, pH 7.4                      | VWR                                                                                  | Cat#J62036.K7   |
| Biocoll                                                             | Merck Millipore                                                                      | Cat#L-6715      |
| 10x RBC lysis buffer                                                | eBioscience                                                                          | Cat#00-4300-54  |
| Hyaluronidase                                                       | Sigma-Aldrich                                                                        | Cat#37326-33-3  |
| Paraformaldehyde                                                    | Sigma-Aldrich                                                                        | Cat#P6148       |
| eBioscience™ Foxp3 /<br>Transcription Factor Staining<br>Buffer Set | eBioscience                                                                          | Cat#00-5523-00  |
| Saponin                                                             | Carl Roth                                                                            | Cat#4185.1      |
| RPMI 1640 medium                                                    | Gibco                                                                                | Cat#21875034    |
| Fetal Bovine Serum (FBS)<br>superior                                | Sigma-Aldrich                                                                        | Cat#S0615       |
| Antibiotic Antimycotic (100x)                                       | Gibco                                                                                | Cat#15240062    |
| IL-2                                                                | NIH AIDS Reagent Program,<br>NIH from Dr. Maurice Gately,<br>Hoffmann - La Roche Inc |                 |
| Lipopolysaccharide (LPS)                                            | Sigma-Aldrich                                                                        | Cat#L2137       |
| Brefeldin A                                                         | Life Technologies                                                                    | Cat#B7450       |
| CLI-095                                                             | InvivoGen                                                                            | Cat#243984-11-4 |
| Dimethyl Sulfoxide                                                  | Sigma-Aldrich                                                                        | Cat#D8418       |
| Poly-L-Lysine                                                       | Fisher Scientific                                                                    | Cat#11440812    |
| Bovine Serum Albumin (BSA)                                          | GE Healthcare                                                                        | Cat#SH30574     |
| DAPI Fluoromount-G®                                                 | Southern Biotech                                                                     | Cat#0100-20     |

## Critical commercial assays

|                                                      |                                             |                    |
|------------------------------------------------------|---------------------------------------------|--------------------|
| Anti-CCP ELISA (IgG)                                 | EUROIMMUN                                   | Cat#EA 1505-9601 G |
| Human Tenascin-C Large (FNIII-<br>C) Assay Kit - IBL | Immuno-Biological Laboratories<br>Co., Ltd. | Cat#27751          |

## Software

|                     |                                                                                     |                      |
|---------------------|-------------------------------------------------------------------------------------|----------------------|
| BD FACSDiva™        | <a href="http://www.bdbiosciences.com">www.bdbiosciences.com</a>                    | Version 8.0.1        |
| FlowJo              | <a href="http://www.flowjo.com">www.flowjo.com</a>                                  | Version 10.7.1       |
| Pluggin: FlowAI     | <a href="https://www.flowjo.com/exchange/#/">https://www.flowjo.com/exchange/#/</a> | Version 2.1          |
| Pluggin: DownSample | <a href="https://www.flowjo.com/exchange/#/">https://www.flowjo.com/exchange/#/</a> | Version 3.3          |
| GraphPad Prism      | <a href="http://www.graphpad.com">www.graphpad.com</a>                              | Version 7.00         |
| Imaris              | <a href="http://www.imaris.oxinst.com">www.imaris.oxinst.com</a>                    | Version 9.5.0        |
| Huygens Essential   | <a href="http://www.svi.nl/Huygens-Software">www.svi.nl/Huygens-Software</a>        | Version 19.10        |
| Microsoft Excel     | <a href="http://www.microsoft.com">www.microsoft.com</a>                            | Version 16.0         |
| Adobe Illustrator   | <a href="http://www.adobe.com">www.adobe.com</a>                                    | Version CS6 (64 bit) |
